# 1 **Bacterial cell cycle control by citrate synthase independent of** 2 **enzymatic activity**

3 Matthieu Bergé<sup>1\*</sup>, Julian Pezzatti<sup>2</sup>, Víctor González-Ruiz<sup>2,3</sup>, Laurence Degeorges<sup>1</sup>, Serge  
4 Rudaz<sup>2,3</sup> and Patrick H. Viollier<sup>1\*</sup>

5 <sup>1</sup>Dept. Microbiology and Molecular Medicine, Faculty of Medicine, University of Geneva,  
6 Geneva, Switzerland

7 <sup>2</sup>Institute of Pharmaceutical Sciences of Western Switzerland (ISPSO), University of Geneva,  
8 Geneva, Switzerland

9 <sup>3</sup>Swiss Centre for Applied Human Toxicology (SCAHT), Basel, Switzerland

10 \* Correspondence: [patrick.viollier@unige.ch](mailto:patrick.viollier@unige.ch); [matthieu.berge@unige.ch](mailto:matthieu.berge@unige.ch)

11

## 12 **ABSTRACT**

13 Coordination of cell cycle progression with central metabolism is fundamental to all cell types  
14 and likely underlies differentiation into dispersal cells in bacteria. How central metabolism is  
15 monitored to regulate cell cycle functions is poorly understood. A forward genetic selection for  
16 cell cycle regulators in the polarized alpha-proteobacterium *Caulobacter crescentus* unearthed  
17 the uncharacterized CitA citrate synthase, a TCA (tricarboxylic acid) cycle enzyme, as  
18 unprecedented checkpoint regulator of the G1→S transition. We show that loss of the CitA  
19 protein provokes a (p)ppGpp alarmone-dependent G1-phase arrest without apparent metabolic  
20 or energy insufficiency. While S-phase entry is still conferred when CitA is rendered  
21 catalytically inactive, the paralogous CitB citrate synthase has no overt role other than  
22 sustaining TCA cycle activity when CitA is absent. With eukaryotic citrate synthase paralogs  
23 known to fulfill regulatory functions, our work extends the moonlighting paradigm to citrate  
24 synthase coordinating central (TCA) metabolism with development and perhaps antibiotic  
25 tolerance in bacteria.

## 26 INTRODUCTION

27 Nutritional control on cellular development and cell cycle progression have been  
28 described in many systems, but only in few instances are the molecular determinants known  
29 that govern the responses. Bacteria are attractive models to elucidate the underlying mechanism  
30 because of their genetic tractability, their apparent morphological and cellular simplicity, and  
31 the robust influence of the changing nutritional states on their growth and morphology. Several  
32 links between central metabolism and cell-cycle have been described (Monahan and Harry  
33 2016) but the underlying molecular mechanisms are poorly understood. Several metabolic  
34 enzymes, often enzyme paralogs, are known to be appropriated for regulatory functions, in  
35 place or in addition to their normal enzymatic functions. These proteins, called moonlighting  
36 or trigger enzymes, are ideal coupling factors to coordinate regulatory changes in response to  
37 metabolic fluctuations (Huberts and van der Klei 2010; Commichau and Stülke 2015). A  
38 notorious example is the aconitase paralog IRE-BP that fulfills a regulatory function as mRNA  
39 repressing protein.

40 The synchronisable  $\alpha$ -proteobacterium *Caulobacter crescentus* is the preeminent model  
41 to elucidate cell cycle control mechanisms. Cell division in *C. crescentus* is asymmetric and  
42 thus yields two dissimilar daughter cells: a stalked and capsulated S-phase cell that replicates  
43 its genome before dividing, and a piliated and flagellated dispersal (swarmer) cell that resides  
44 in the non-replicative and non-dividing G1-phase (Figure 1A) (Goley et al. 2007; Kirkpatrick  
45 and Viollier 2012; Ausmees and Jacobs-Wagner 2003). While the old pole of the stalked cell  
46 features a cylindrical extension of the cell envelope (the stalk), the one of the swarmer cell is  
47 characterized by a flagellum and several adhesive pili. The polar placement of organelles is  
48 dictated by polar scaffolding proteins including the TipN coiled-coil protein (Figure 1A)  
49 (Huitema et al. 2006; Lam et al. 2006) and the PopZ polar organizer (Bowman et al. 2008;

50 Ebersbach et al. 2008). As polar remodeling occurs during the cell cycle, it is not surprising  
51 that polarity determinants also affect cell cycle progression (Bergé and Viollier. 2017).

52 The swarmer cell is obliged to differentiate into a stalked cell in order to generate  
53 progeny. During the swarmer-to-stalked cell transition (also known as the G1→S transition),  
54 the flagellum is shed, pili are retracted, and a stalk is elaborated from the vacated pole while  
55 replication competence is acquired. A regulatory protein that coordinates morphological and  
56 cell cycle stages is the essential cell cycle transcriptional regulator A, CtrA, a DNA-binding  
57 (OmpR-like) response regulator that upon phosphorylation, directly binds and regulates the  
58 origin of replication (*ori*) (Laub et al. 2000; Quon et al. 1996) and promoters of developmental  
59 genes, including promoters that fire only in G1-phase (Fumeaux et al. 2014), such as *pilA* which  
60 encodes the structural subunit of the pilus filament (Skerker and Shapiro 2000), several flagellin  
61 genes and other genes controlling cell envelope modification (Ardissone and Viollier 2015).

62 CtrA is phosphorylated (CtrA~P) by a complex phospho-signaling pathway that  
63 regulates the activity and abundance of CtrA during the *C. crescentus* cell cycle (Figure 1A)  
64 (Jacobs et al. 1999; Biondi et al. 2006; Paul et al. 2008; Wu et al. 1998; Tsokos and Laub 2012).  
65 During the G1→S transition, CtrA is dephosphorylated and a proteolytic branch responsible  
66 for the degradation of CtrA is activated (Joshi and Chien 2016). This pathway involves the  
67 protease ClpXP and three selectivity factors that present CtrA to ClpXP (Figure 1A). These  
68 proteolytic adaptors namely CpdR, RcdA and PopA are organized into a regulatory hierarchy  
69 that coordinates the degradation of many substrates precisely during the G1→S transition  
70 (Iniesta and Shapiro 2008; McGrath et al. 2006; Duerig et al. 2009; Joshi et al. 2015). Upon  
71 degradation of CtrA, the DNA replication block is relieved and G1-phase genes are no longer  
72 expressed. Thus, maintenance of cells in G1 phase, requires that CtrA remains present and  
73 phosphorylated (Domian et al. 1997).

74           The duration of the G1 period is affected by nutrient availability in *C. crescentus* and  
75 other  $\alpha$ -proteobacteria (De Nisco et al. 2014). Upon nitrogen or carbon starvation, the G1→S  
76 transition is blocked (Leslie et al. 2015; England et al. 2010; Lesley and Shapiro 2008; Britos  
77 et al. 2011; Gorbatyuk and Marczynski 2005). This G1 block is associated with the  
78 accumulation of the guanosine tetra- and penta-phosphate [(p)ppGpp] alarmone (Figure 1A)  
79 (Lesley and Shapiro 2008; Ronneau et al. 2016), which affects important cellular processes in  
80 bacteria such as transcription, translation or DNA replication (Liu et al. 2015; Zhang et al. 2018;  
81 Wang et al. 2019). Rsh family proteins directly modulate the intracellular level of (p)ppGpp  
82 and most bacterial genomes encode at least one bifunctional Rsh protein able to synthesize and  
83 hydrolyze (p)ppGpp. *C. crescentus* encodes a single bifunctional enzyme, named SpoT (Lesley  
84 and Shapiro 2008; Ronneau et al. 2016; Atkinson et al. 2011; Boutte et al. 2012). Previous  
85 studies have shown that (p)ppGpp accumulation leads to a stabilization of CtrA by an unknown,  
86 yet (p)ppGpp-dependent mechanism, impairing the G1→S transition (Leslie et al. 2015; Lesley  
87 and Shapiro 2008; Gonzalez and Collier 2014).

88           Here, we report that citrate synthase (CitA), the first enzyme of the Krebs (tricarboxylic  
89 acid, TCA) cycle that condenses oxaloacetate and acetyl-CoA, fulfills an unprecedented role as a  
90 checkpoint regulator controlling the G1→S transition. Selecting for mutations that elevate the  
91 G1-phase population unearthed a loss of function-mutation in the *citA* gene. The effects of this  
92 mutation are nullified when (p)ppGpp production is lost and are not due to glutamate  
93 auxotrophy, as it is typically the case for citrate synthase mutants in other bacterial model  
94 systems such as *Escherichia coli*. Even though CitA is a functional citrate synthase, the paralog  
95 CitB can sustain enzymatic function but not cell cycle control. As even catalytically inactive  
96 CitA retains cell cycle control, we conclude that it acts as the first bacterial moonlighting  
97 enzyme that acts on central metabolism and, independently, on S-phase entry.

98

## 99 RESULTS

100

### 101 G1-phase defect in cells lacking TipN and adaptors of the ClpXP machinery

102 Flow cytometric analysis by fluorescence activated cell sorting (FACS) is a convenient  
103 way of scoring cell cycle defects of a population of cells. In our efforts to explore the function  
104 of the TipN polarity factor, we conducted FACS analysis of wild-type (*WT*) and  $\Delta tipN$  cells  
105 and found a 47% reduction in the abundance of G1-phase cells (Figure 1D) in the latter, without  
106 a strong effect on growth or efficiency of plating (Figure 1C). Next, we sought mutations that  
107 accentuate the G1-phase defect of  $\Delta tipN$  by comparative transposon (Tn) insertion site  
108 sequencing (Tn-Seq) of *WT* and  $\Delta tipN$  cells, reasoning that Tn insertions that decrease the  
109 fitness of  $\Delta tipN$  cells might further reduce the production of G1-phase cells. This Tn-Seq  
110 analysis revealed that Tn insertions in the *popZ* gene encoding a polar scaffold protein  
111 (Bowman et al. 2008; Ebersbach et al. 2008) were underrepresented in  $\Delta tipN$  compared to *WT*  
112 cells (Supplemental Table 1), recapitulating the synthetic lethal interaction between the two  
113 polarity hubs encoded by *tipN* and *popZ* (Ebersbach et al. 2008). Surprisingly, Tn-Seq also  
114 revealed that Tn insertions in genes reducing CtrA activity (PleC) are underrepresented in  $\Delta tipN$   
115 versus *WT* cells while genes increasing CtrA activity are overrepresented (DivJ), suggesting  
116 that the activity of the G1-phase regulator CtrA is reduced in  $\Delta tipN$  cells as already hinted by  
117 FACS analysis (see above).

118 Paradoxically, our Tn-Seq analysis also revealed an underrepresentation of Tn  
119 insertions in the *cpdR*, *rcdA* and *popA* genes in  $\Delta tipN$  versus *WT* cells (Figure 1B and Figure 1-  
120 Figure supplemental 1A), a result that was confirmed by reverse Tn-Seq experiment  
121 determining the abundance of Tn insertions in the *tipN* gene of  $\Delta cpdR$  versus *WT* cells (Figure  
122 1- Figure supplemental 1B). If CtrA activity is low in  $\Delta tipN$  cells, then Tn insertions in *cpdR*,  
123 *rcdA* or *popA* would be expected to have a beneficial effect to  $\Delta tipN$  cells because these genes

124 promote the turnover of CtrA (and other proteins) at the G1→S transition (Joshi and Chien  
125 2016; Joshi et al. 2015; Iniesta et al. 2006; Duerig et al. 2009; McGrath et al. 2006), so  
126 disruption in these genes should raise CtrA levels. Alternatively, since they also control the  
127 stability of proteins other than CtrA, another ClpXP substrate might be responsible for  
128 enhancing the cell cycle defect of  $\Delta tipN$  cells.

129 To confirm the genetic relationship between *tipN* and *cpdR*, *rcdA* or *popA*, we created  
130 double mutants by introducing either the  $\Delta cpdR$ ,  $\Delta rcdA$  or  $\Delta popA$  mutation into  $\Delta tipN$  cells and  
131 found that all double mutants exhibit a reduction in viability by three orders of magnitude on a  
132 logarithmic scale (Figure 1C; Figure 1- Figure supplemental 1C and 1D). Examination of  $\Delta tipN$   
133  $\Delta cpdR$  double mutant cells by phase contrast microscopy revealed that they are 70% more  
134 elongated on average compared to *WT* and  $\Delta cpdR$  or  $\Delta tipN$  single mutant cells (Figure 1D and  
135 Figure 1- Figure Supplemental 1F). Flow cytometry analysis of exponentially growing  $\Delta tipN$   
136  $\Delta cpdR$  double mutant cells by fluorescence activated cell sorting (FACS) revealed a strong  
137 reduction (85%) in the number of G1-phase cells and a massive increase of cells with multiple  
138 (>2) chromosomes compared to *WT* cells, whereas  $\Delta cpdR$  and  $\Delta tipN$  single mutants only  
139 showed a slight decrease in the G1 population (Figure 1D). Importantly, the  $\Delta tipN \Delta rcdA$  and  
140  $\Delta tipN \Delta popA$  double mutants showed a similar accumulation of elongated cells and reduction  
141 in G1-phase cells number (Figure 1- Figure supplemental 1E and 1F).

142 We reasoned that the accumulation of a ClpXP substrate whose degradation is  
143 dependent on CpdR, RcdA and PopA causes a cell cycle defect in  $\Delta tipN$  cells. Seeking to  
144 uncover Tn insertions in a gene encoding a ClpXP substrate that when inactivated ameliorates  
145 growth of  $\Delta tipN \Delta cpdR$  cells, we conducted Tn-Seq in  $\Delta tipN \Delta cpdR$  double mutant cells and  
146 found a 19-fold increase in Tn insertions in the *kidO* gene in  $\Delta tipN \Delta cpdR$  double mutant cells  
147 compared to *WT* cells or  $\Delta tipN$  and  $\Delta cpdR$  single mutant cells (Figure 1- Figure supplemental  
148 2A). KidO is a bifunctional oxidoreductase-like protein degraded by ClpXP that integrates cell

149 fate signaling with cytokinesis in *C. crescentus* (Radhakrishnan et al. 2010) by preventing  
150 premature assembly of the cytokinetic structure of FtsZ polymers in G1 phase and promoting  
151 FtsZ-ring disassembly in G2 phase (Beaufay et al. 2015). KidO is not present in S-phase when  
152 FtsZ polymerizes at the division site as its degradation by ClpXP is stimulated by CpdR, RcdA  
153 and PopA at the G1→S transition. In cells lacking these proteolytic adaptors, KidO is no longer  
154 degraded at the G1→S transition and is, therefore, present throughout the cell cycle  
155 (Radhakrishnan et al. 2010). To test if KidO stabilization induces filamentation of  $\Delta tipN \Delta cpdR$   
156 cells, we expressed the *kidO<sup>AA::DD</sup>* allele from the *xylX* locus in  $\Delta tipN$  cells. This allele encodes  
157 a mutant form of KidO in which the two penultimate alanine residues are both substituted by  
158 aspartic acid, a double substitution that prevents degradation of KidO by the ClpXP protease at  
159 the G1→S transition, akin to the  $\Delta cpdR$  mutation (Radhakrishnan et al. 2010). The resulting  
160  $\Delta tipN xylX::kidO^{AA::DD}$  cells are highly filamentous, even without induction of the *xylX*  
161 promoter by xylose, with a strong decrease of the G1 population and an increase of cells  
162 containing more than two chromosomes recapitulating the phenotype of the  $\Delta tipN \Delta cpdR$   
163 double mutant cells (Figure 1- Figure supplemental 2B). Conversely, an in-frame deletion in  
164 *kidO* ( $\Delta kidO$ ) restores a near *WT* division phenotype to  $\Delta tipN \Delta cpdR$  cells strain (Figure 1-  
165 Figure supplemental 2B).

166 Thus, stabilization of KidO in cells lacking TipN inhibits cell division and prevents the  
167 accumulation of G1 dispersal cells.

168

### 169 **Genetic screen to identify regulators of the G1 to S transition**

170 Since KidO is also known to act negatively on CtrA phosphorylation which is required  
171 for G1 cell accumulation (Radhakrishnan et al. 2010), we speculated that decrease in the G1  
172 population of  $\Delta tipN \Delta cpdR$  is due to very low CtrA activity. To confirm that CtrA activity is  
173 indeed reduced, we introduced a *pilA::P<sub>pilA</sub>-GFP* probe reporter into the *pilA* locus of *WT*,  $\Delta tipN$

174 or  $\Delta cpdR$  single mutant, and  $\Delta tipN \Delta cpdR$  double mutant cells. This reporter harbors the CtrA-  
175 dependent *pilA* promoter ( $P_{pilA}$ ) that fires in G1-phase and PilA start codon translationally fused  
176 to the green fluorescent protein (GFP). GFP expression from this reporter can be conveniently  
177 observed and quantified by live-cell fluorescence microscopy (Figure 2A). In agreement with  
178 the FACS analysis shown in Figure 1E, GFP fluorescence is reduced in  $\Delta tipN$  cells versus WT  
179 or  $\Delta cpdR$  cells, but in  $\Delta tipN \Delta cpdR$  double mutant cells, a strong decrease in GFP fluorescence  
180 was observed indicating a strong downregulation in CtrA-dependent reporter activity.  
181 Likewise, a transcriptional fusion of  $P_{pilA}$  to the promoter-less *nptII* gene (conferring resistance  
182 to kanamycin) at the *pilA* locus ( $pilA::P_{pilA}-nptII$ ) is strongly reduced in  $\Delta tipN \Delta cpdR$  double  
183 mutant cells versus *WT* cells, precluding growth of  $\Delta tipN \Delta cpdR$  on plates containing 20  $\mu\text{g}/\text{mL}$   
184 kanamycin (Figure 2B) because  $P_{pilA}$  is poorly active, whereas *WT* cells harboring this reporter  
185 grow.

186 Next we used these reporter cells to find mutations that maintain CtrA active in the  
187 absence of TipN and CpdR. To this end, we mutagenized  $\Delta tipN \Delta cpdR P_{pilA}-nptII$  reporter cells  
188 using a mini-*himarI* Tn (Mar2xT7), encoding gentamycin resistance (GmR), and selected for  
189 growth on plates containing kanamycin and gentamycin. Among several isolated mutants, one  
190 mutant was isolated harboring a Tn insertion in the middle of the *CCNA\_01983* (henceforth  
191 *citA*) gene whose gene product is annotated as a type II citrate synthase (PRK05614). After  
192 backcrossing experiments confirmed that the *citA::Tn* mutation confers kanamycin resistance  
193 to  $\Delta tipN \Delta cpdR P_{pilA}-nptII$  reporter cells, we engineered an in-frame deletion of *citA* ( $\Delta citA$ )  
194 and found that this mutation also supports growth  $\Delta tipN \Delta cpdR P_{pilA}-nptII$  reporter cells on  
195 kanamycin plates, indicating that loss of *citA* function augments  $P_{pilA}$  activity (Figure 2B). The  
196 *citA::Tn* or the  $\Delta citA$  mutations both correct the abnormal cell size distribution (cell  
197 filamentation) and augment the G1 population of  $\Delta tipN \Delta cpdR$  double mutant cells (Figure 2C  
198 and Figure 2- Figure supplemental 1).



199 In sum, inactivation of *citA* gene leads to an increase of  $P_{pilA}$  activity and G1 cell  
200 production, while ameliorating the division defect of cells lacking TipN and CpdR.

201

## 202 **CitA encodes a citrate synthase**

203 The primary structure of CitA resembles citrate synthases that execute the first  
204 enzymatic reaction in the Krebs (tricarboxylic, TCA) cycle with the condensation of the acetyl  
205 group from acetyl-CoA onto oxaloacetate to form citrate (Figure3- Figure supplemental 1A)  
206 (Figure 3A). *C. crescentus* CitA has 65% amino acid identity to the GltA citrate synthase from  
207 *Escherichia coli* K12 (strain MG1655) and 32 % identity to CitA from *Bacillus subtilis* (strain  
208 168). To confirm that *C. crescentus* CitA indeed has citrate synthase activity, we probed for  
209 heterologous complementation of the glutamate auxotrophy of *E. coli*  $\Delta$ *gltA* cells that lack  
210 citrate synthase activity (Lakshmi and Helling 1976). To this end, we engineered *E. coli*  $\Delta$ *gltA*  
211 cells expressing either *C. crescentus* CitA or *E. coli* GltA from a multicopy plasmid. As  
212 expected, *E. coli*  $\Delta$ *gltA* cells harboring the empty vector are unable to grow in (M9) minimal  
213 medium without glutamate, but  $\Delta$ *gltA* cells grew well in the presence of either the *gltA*- or the  
214 *citA*-expression plasmid (Figure 3B). Thus, *C. crescentus citA* encodes a functional citrate  
215 synthase.

216 Next, we conducted metabolic profiling experiments using liquid chromatography  
217 coupled to high-resolution mass spectrometry (LC-HRMS) to quantify the abundance of  
218 intracellular metabolites in *C. crescentus* *WT* and *citA::Tn* or  $\Delta$ *citA* cells grown in PYE (Pezzatti  
219 et al. 2019a). Robust quantitation of 103 metabolites (Supplemental Table S2) revealed that the  
220 metabolomic profile of *citA::Tn* resembles that of  $\Delta$ *citA* cells. Surprisingly, these metabolomic  
221 analyses did not show any significant difference in many of TCAs like citrate and isocitrate  
222 (Figure 3- Figure supplemental 1B). An indication that TCA cycle flux is nevertheless affected

223 in the absence of CitA comes from the observation of a small increase in the levels of acetyl-  
224 CoA, as would be expected for citrate synthase mutant cells (Figure 3C).

225 The relatively modest effect of the  $\Delta citA$  mutation on TCA cycle activity might be due  
226 to the presence of a protein(s) other than CitA with citrate synthase activity. Unlike other TCA  
227 cycle enzymes, CitA is not essential for viability of *C. crescentus* cells on PYE (Christen et al.  
228 2011). Therefore, we reasoned that CitA is not the only citrate synthase-like protein encoded in  
229 the *C. crescentus* genome. Indeed, BLAST searches revealed the presence of two other putative  
230 citrate synthase genes: *CCNA\_03757* and *CCNA\_03758* (Figure 3- Figure supplemental 1A)  
231 (henceforth *citB* and *citC*, respectively), annotated also as non-essential for viability (Christen  
232 et al. 2011). The *citB* and *citC* genes encode proteins with 30% and 32% identity to CitA from  
233 *C. crescentus*, 30% and 33% identity to GltA from *E. coli* K12 (MG1655) and 37% and 32%  
234 identity to CitA from *B. subtilis* (168). We therefore tested the ability of *citB* and *citC* to support  
235 citrate synthase function by heterologous complementation of the glutamate auxotrophy of *E.*  
236 *coli*  $\Delta gltA$  cells on minimal medium lacking glutamate and found that expression of CitB, but  
237 not CitC, supported growth (Figure 3B). Thus, *C. crescentus citB* also encodes a functional  
238 citrate synthase. On the basis of these results, we speculated that *C. crescentus citA* mutants are  
239 able to grow because of residual citrate synthase activity conferred by CitB. To test if CitA is  
240 essential in cells lacking both *citB* and *citC*, we first created a strain with in-frame deletions in  
241 *citB* and *citC* ( $\Delta citBC$ ) and then attempted to introduce *citA::Tn* (encodes gentamycin  
242 resistance) or  $\Delta citA$  (tagged with a kanamycin resistance marker,  $\Delta citA::pNPTS138$ ) by  $\phi Cr30$ -  
243 mediated generalized transduction. Unlike *WT* cells,  $\Delta citBC$  cells did not accept *citA::Tn* or  
244  $\Delta citA::pNPTS138$  generalized transducing particles (Figure 3D), but accepted generalized  
245 transducing particles harboring another genomic locus marked with either the gentamycin or  
246 the kanamycin resistance gene with similar efficiency as *WT* cells. We conclude that *C.*

247 *crenscentus* encodes at least two functional citrate synthases, one of which is absolutely required  
248 for growth on PYE.

249

### 250 **CitA promotes S-phase entry**

251 To determine how loss of CitA signals G1 cell accumulation, we combined population-  
252 based and single cell approaches. First, EOP and growth curves indicate that the absence of  
253 CitA leads to a slow growth phenotype on PYE rich medium and that CitA is required for  
254 growth on minimal M<sub>2</sub>G medium (Figure 4A). Phase contrast microscopy of *citA::Tn* or  $\Delta$ *citA*  
255 mutants showed that they are more phase-bright than *WT* cells (Figure 4B). In *C. crescentus*  
256 phase darkness is typically caused by intracellular polyphosphate granules that appear under  
257 stress conditions (Boutte et al. 2012). Thus, *citA* mutant cells might be defective in  
258 accumulating polyphosphate granules, perhaps because they are metabolized [converted into  
259 (p)ppGpp, see below] when cells are under nutritional stress. Moreover, microscopy revealed  
260 that  $\Delta$ *citA* cells are shorter and narrower than *WT* cells (area of  $0.42 \pm 0.009 \mu\text{m}$  and  $0.43 \pm 0.007$   
261  $\mu\text{m}$  respectively for the *citA::Tn* and  $\Delta$ *citA* compared to  $0.69 \pm 0.01 \mu\text{m}$  for *WT* cells, Figure 4B),  
262 perhaps because they spend more time in the non-growing G1 phase. Indeed, FACS analysis  
263 revealed a strong increase in the G1-phase population in the absence of CitA ( $68.3 \pm 1.25\%$  and  
264  $69.3 \pm 1.22$  of *citA::Tn* and  $\Delta$ *citA* cells reside in G1 phase compared to  $36.1 \pm 0.6\%$  of *WT* cells,  
265 Figure 4B). Importantly, these phenotypes of *citA* mutant cells cannot be corrected by the  
266 addition of exogenous glutamine and, therefore, are not related to glutamine auxotrophy.  
267 Indeed, addition of glutamine to PYE or to M2G (minimal medium) did not ameliorate growth  
268 or division as determined by EOP assays (Figure 4- Figure supplemental 1A). Moreover, the  
269 addition of glutamine did also not restore a normal FACS profile to *citA* mutant cells (Figure  
270 4- Figure supplemental 1B). Arguing that these functions likely depend on the presence of the  
271 CitA protein rather than citrate synthase enzymatic activity, the *citA* mutant phenotypes were

272 not corrected by complementation of *citA* mutant cells with a multi-copy plasmid harboring *C.*  
273 *crenscentus citB* (pMT335-*citB*) or *E. coli gltA* (pMT335-*gltA*) (Figure 4C). However, these  
274 deficiencies were corrected when a *WT* copy of *citA* was expressed *in trans* on a multi-copy  
275 plasmid (pMT335-*citA*) (Figure 4C). Thus, CitA promotes the G1→S transition, a function that  
276 other citrate synthases such as CitB and GltA cannot provide, despite having citrate synthase  
277 activity. Further support for the conclusion that CitA fulfills a regulatory role independent of  
278 catalytic activity came from discovering that catalytically inactive CitA still retained regulatory  
279 function. Residue H306 of *E. coli* GltA is critical to bind the oxaloacetate and its substitution  
280 prevents the catalytic activity of GltA (Pereira et al. 1994; Handford et al. 1988). We thus  
281 engineered variants in which the corresponding residue (H303) in *C. crescentus* CitA is  
282 substituted either by a tryptophan or an alanine, giving rise to the H303W and H303A CitA  
283 variants. As expected, expression of the CitA<sup>H303W</sup> or CitA<sup>H303A</sup> variant in *E. coli*  $\Delta$ *gltA* cells  
284 no longer corrected the glutamate auxotrophy on minimal medium as determined by EOP  
285 assays (Figure 4- Figure supplemental 1C). Immunoblotting using polyclonal antibodies to  
286 CitA revealed that these variants are produced to the same levels as WT CitA (Figure 4- Figure  
287 supplemental 4D). We therefore conclude that CitA<sup>H303W</sup> and CitA<sup>H303A</sup> have lost enzymatic  
288 activity. When these variants were expressed in *C. crescentus*  $\Delta$ *citA* mutant cells to similar  
289 levels than WT CitA (Figure 4- Figure supplemental 1E), a normal FACS profile and cell size  
290 distribution was observed by FACS and phase contrast microscopy, respectively (Figure 4D).  
291 In sum, these results show that the catalytic activity of CitA is dispensable for its cell cycle  
292 regulatory function.

293 As the abundance of numerous regulators involved in the G1→S transition was  
294 previously shown to fluctuate in abundance during the cell cycle like SpmX (Radhakrishnan et  
295 al. 2008), KidO (Radhakrishnan et al. 2010), DivJ (Wheeler and Shapiro 1999) and CtrA  
296 (Domian et al. 1997), we wondered if the abundance of CitA is cell-cycle regulated. To this

297 end, we monitored CitA abundance in synchronized cells by immunoblotting using polyclonal  
298 antibodies to CitA. In contrast to CtrA that is present in the swarmer and pre-divisional cells  
299 while absent in the stalked cell, CitA is present at a constant level along the cell cycle (Figure  
300 4- Figure supplemental 1F), indicating that the cell cycle control function of CitA is mediated  
301 at the level of activity.

302

### 303 **CitA is required for S-phase entry in the presence of (p)ppGpp**

304 To establish that CitA is required for the G1→S transition, cell cycle studies using  
305 synchronized *WT* and *citA* mutant cells were performed. FACS analysis revealed that *WT* cells  
306 initiate DNA replication 30 minutes after the release of G1 cells into PYE, whereas *citA::Tn* or  
307  $\Delta$ *citA* cells do not enter S-phase before the 90 minute time point (Figure 4- Figure supplemental  
308 1G). We also discovered that a fraction of *citA::Tn* or  $\Delta$ *citA* cells remained in G1 phase, with  
309 only approximately half entering S-phase. To confirm this interpretation, we conducted single  
310 cell time-lapse microscopy experiments with synchronized *WT* and *citA::Tn* or  $\Delta$ *citA* G1 cells  
311 expressing GFP-ParB as a marker for DNA replication (figure 4E). ParB is a chromosome  
312 partitioning protein that specifically binds near the origin of replication (*C<sub>ori</sub>*) and is translocated  
313 with a duplicated copy of *C<sub>ori</sub>* to the daughter cell compartment once DNA replication  
314 commences (Mohl and Gober 1997; Thanbichler and Shapiro 2008). In synchronized *WT* cells  
315 expressing ParB-GFP, we observed that G1 cells initially harbor a single, polarly localized *C<sub>ori</sub>*,  
316 represented by a single GFP-ParB focus. After 40 minutes, ~80% (n=39) of the cells replicated  
317 *C<sub>ori</sub>* visualized as a duplicated GFP-ParB focus, one of which is segregated to the opposite pole.  
318 Finally, cell division is completed by 120 minutes. By contrast, in *citA::Tn* (n=35) or  $\Delta$ *citA*  
319 (n=29) cells, duplicated GFP-ParB foci only appeared in some cells 100 minutes after  
320 synchronization. Importantly, we noticed that even after 260 minutes, ~60% of the population

321 still exhibited only one GFP-ParB focus. Thus, a large fraction of the population remains in  
322 G1-phase and that only part of the *citA* mutant population enters S-phase.

323 To determine the genetic basis of the G1 block of *citA::Tn* or  $\Delta$ *citA* cells, we isolated  
324 fast growing suppressor mutants by serial dilution of two independent *citA::Tn* or  $\Delta$ *citA*  
325 cultures, re-diluting them each day for 4 days (Figure 5A). Whole-genome sequencing of two  
326 *citA::Tn* and one  $\Delta$ *citA* suppressor mutant that grew faster (identified as large colonies, Figure  
327 5B) revealed a different frameshift mutation in the same region of the PEP-phosphotransferase  
328 domain-encoding region of PtsP (CCNA\_00892) (Figure 5C). PtsP resembles the first enzyme  
329 of a nitrogen-related PEP-phosphotransferase (PTS<sup>Ntr</sup>) protein homologue (EI<sup>Ntr</sup> in  
330 Enterobacteria) that typically uses PEP rather than ATP as the phospho-donor to phosphorylate  
331 clients proteins such as the HPr phospho-carrier protein (Deutscher et al. 2014) (Figure 5D).  
332 We hypothesized that the PtsP frameshift mutation in the *citA* suppressor mutants eliminated  
333 or decreased PtsP function. If so, an in-frame deletion in *ptsP* ( $\Delta$ *ptsP*) should recapitulate the  
334 fast-growing phenotype of *citA* mutant cells. In agreement with this, when the  $\Delta$ *citA* mutation  
335 was introduced into  $\Delta$ *ptsP* cells, the resulting double mutants grew faster in PYE broth than the  
336  $\Delta$ *citA* single mutant (Figure 5- Figure supplemental 1A). Moreover, EOP assays of single and  
337 double mutants revealed that the  $\Delta$ *ptsP* mutation increases the viability of *citA* mutant cells  
338 (Figure 5- Figure supplemental 1A). Finally, and importantly, the FACS profile of  $\Delta$ *ptsP*  
339 *citA::Tn* double mutant cells mirrors that of *WT* cells, indicating that loss of PtsP indeed  
340 nullifies the severe G1 block caused by loss of CitA (Figure 5E).

341 Since *C. crescentus* PtsP is known to inhibit the hydrolase activity of SpoT (Figure 5D),  
342 the bifunctional synthase/hydrolase of the (p)ppGpp alarmone that can extend the G1-phase of  
343 the cell cycle in *C. crescentus* (Stott et al. 2015; Gonzalez and Collier 2014; Ronneau et al.  
344 2016), we reasoned that a  $\Delta$ *spoT* mutation should also be epistatic to the *citA* mutation. Indeed,  
345 when the *citA::Tn* mutation was transduced into  $\Delta$ *spoT* cells, the resulting double mutant

346 exhibited a similar growth rate and FACS profile as the *WT* (Figure 5E, Figure 5- Figure  
347 supplemental 1A). In sum, these results suggest that the absence of *citA* leads to an activation  
348 of PtsP which in turn leads to an accumulation of (p)ppGpp in a SpoT-dependent manner. The  
349 resulting increase in (p)ppGpp then elicits the G1 arrest by maintaining CtrA activity. If true,  
350 then the *citA* mutation may have simply surfaced in the screen for  $\Delta tipN \Delta cpdR$  double mutant  
351 cells mutants with elevated CtrA activity because (p)ppGpp enhances CtrA activity. Consistent  
352 with this model, we found that the FACS profile is reversed in  $\Delta cpdR \Delta tipN \Delta citA \Delta spoT$  and  
353  $\Delta cpdR \Delta tipN \Delta citA \Delta ptsP$  quadruple mutant compared to  $\Delta cpdR \Delta tipN \Delta citA$  triple mutant cells,  
354 resembling that of the  $\Delta tipN \Delta cpdR$  double mutant cells (Figure 5- Figure supplemental 1B).  
355 These experiments show that the suppression by *citA* is dependent on the presence of PtsP and  
356 SpoT. Importantly, artificial induction of (p)ppGpp in  $\Delta tipN \Delta cpdR$  double mutant expression  
357 of a constitutively active form of the *E. coli* (p)ppGpp synthetase RelA (referred to RelA') from  
358 the *C. crescentus xylX* locus (Gonzalez and Collier 2014) is sufficient to induce an increase in  
359 G1 cells (Figure 5- Figure supplemental 1C), whereas a catalytic inactive mutant of RelA'  
360 (named RelA'<sup>E335Q</sup>) is unable to do so.

361

## 362 **DISCUSSION**

363 To our surprise, a genetic selection for regulators of the G1-phase promoter,  $P_{pilA}$ , in *C.*  
364 *crescentus* identified the gene encoding CitA citrate synthase as negative regulator of G1-phase.  
365 Our demonstration that CitA is a functional citrate synthase enzyme along with the fact that a  
366 catalytically active variant still retains the cell cycle control functions, implicates this protein  
367 as unprecedented coordinator of bacterial cell cycle progression and central (TCA) metabolism  
368 (Figure 5D).

369 Specifically, CitA promotes S-phase entry as evidenced by our finding that inactivation  
370 of CitA blocks the G1→S transition using (p)ppGpp (Boutte et al. 2012; Gonzalez and Collier

2014). Consistent with the notion that (p)ppGpp stalls cells in G1-phase by maintaining (active) CtrA, the *citA::Tn* mutation was isolated by a selection for elevated activity of the CtrA-dependent  $P_{pilA}$  promoter. CtrA is regulated at the level of abundance through proteolysis (and synthesis) and at the level of activity by phosphorylation. Since CtrA is already rendered stable (by the *cpdR* mutation) in the mutant background in which the screen was conducted, our findings imply that the *citA::Tn* mutation and (p)ppGpp stimulates CtrA activity, a role of (p)ppGpp that had not be inferred in prior studies. With this effect on CtrA, arguably the master regulator of *C. crescentus* development, enzymatic activity of CitA is situated at key junction in central metabolism while fulfilling a key regulatory role in bacterial cell cycle control and differentiation, as suggested by the finding that nutritional stress may also act on CtrA in other alpha-proteobacteria such as the symbiont *Sinorhizobium meliloti* (De Nisco et al. 2014), raising the possibility that the ortholog (SMc02087, 70% identity to CitA) also contributes to cell cycle control and possibly plant symbiosis via (p)ppGpp or other effectors. As (p)ppGpp has also been implicated in regulating antibiotic tolerance in different species and recent links between TCA genes and antibiotic tolerance have been observed (Sinha et al.; Zalis et al. 2019), our finding that CitA mutants experience a (p)ppGpp-dependent G1 arrest, may provide an explanation of why bacteria are less susceptible to bactericidal antibiotics under TCA cycle stress.

389

### 390 **(p)ppGpp and metabolic control of the cell cycle**

391 Remarkably, the cell cycle imbalances caused by the loss of CitA are mitigated when  
392 (p)ppGpp production is abolished (by the  $\Delta spoT$  or  $\Delta ptsP$  mutation), indicating that loss of the  
393 enzymatic activity of CitA is not detrimental to cells, whereas other TCA cycle enzymes are  
394 essential for viability. Interestingly, carbon starvation in *C. crescentus* leads to a phenotype  
395 resembling that of the G1-arrested  $\Delta citA$  cells and a smaller cell volume induced by (p)ppGpp



396 signaling (Lesley and Shapiro 2008; Leslie et al. 2015). Importantly, ectopic (p)ppGpp  
397 production from RelA' phenocopies  $\Delta citA$  cells, impairing the G1→S transition and retaining  
398 cells in the G1-phase swarmer (dispersal) state (Gonzalez and Collier 2014). The underlying  
399 mechanism is the production of the (p)ppGpp alarmone by the SpoT enzyme induced by PtsP.  
400 While PtsP has recently been shown to stimulate (p)ppGpp production in response to glutamine  
401 deprivation, thought to arise from nitrogen starvation (Ronneau et al. 2016), our metabolomic  
402 data reveal no difference in the glutamine pool comparing the WT and the  $\Delta citA$ , indicating that  
403 CitA controls PtsP and SpoT via a different input. In support of this, addition of glutamine did  
404 not correct the defects of  $\Delta citA$  cells. Indeed, the Pts<sup>Ntr</sup> could be activated by several pathways  
405 leading to the (p)ppGpp production.

406         While (p)ppGpp signaling has mainly been described for cells experiencing nutritional  
407 stress conditions in stationary phase or in medium lacking nutrients, (p)ppGpp signaling has  
408 also been implicated in nutrient replete conditions, notably during the *C. crescentus* cell cycle  
409 (Boutte et al. 2012). In addition, a basal level of (p)ppGpp is crucial for global control of  
410 transcription, translation and cell size control in unstressed conditions in cyanobacteria  
411 (Puszynska and O'Shea 2017). A possible explanation for these effects is that cells experience  
412 nutritional stress during distinct cell cycle phases owing to metabolite fluctuations, caused by  
413 variabilities in enzyme abundance or activities during the cell cycle. Recently evidence has  
414 been provided that the cellular redox potential changes as a function of the *C. crescentus* cell  
415 cycle (Narayanan et al. 2015), suggesting the redox equivalents fluctuate. Since CitA is present  
416 throughout the cell cycle, it is possible that allosteric regulation by its substrates underlies the  
417 regulatory effects or other mechanisms or post-translational regulation may act on CitA.

418         Evidence supporting allosteric regulation has been provided for the cell cycle-regulated  
419 KidO protein, an NADH-binding oxidoreductase homolog, that is present in G1-phase and  
420 during cell constriction. KidO is a bifunctional enzyme that acts as a cell division inhibitor that

421 binds FtsZ and it also acts negatively on the CtrA activation pathway (Radhakrishnan et al.  
422 2010). These activities explain why abolishing the cell-regulated proteolysis of KidO by the  
423 CpdR-regulated ClpXP pathway can simultaneously shorten the G1-phase and impair  
424 cytokinesis. Inactivation of *kidO* in cells lacking TipN and CpdR alleviates these problems,  
425 showing that KidO is the major source of cellular mis-regulation in the absence of TipN, a polar  
426 organizer that marks the new cell pole and is re-localized to the division plane during  
427 constriction (Lam et al. 2006; Huitema et al. 2006). As TipN is also known to associate with  
428 late division proteins *in vivo* (Yeh et al. 2010; Goley et al. 2011), it is not surprising that cells  
429 lacking TipN are slightly filamentous and perhaps predisposed to accentuated cell division  
430 problems compared to *WT* cells when imbalances in cell division regulators such as KidO occur.  
431 Interestingly another division regulator that functions as moonlighting enzyme and that is  
432 degraded in a ClpXP and CpdR-dependent manner has been identified: the glutamate  
433 dehydrogenase GdhZ whose activity is modulated by glutamate and NADH (Beaufay et al.  
434 2015). Together KidO and GdhZ show how substrate binding folds can be used to coordinate  
435 cell division in response to metabolic inputs, while CitA, independently of its enzymatic  
436 activity, links central metabolism with cell cycle development level through CtrA and  
437 (p)ppGpp.

438

### 439 **Enzyme redundancy and moonlighting**

440 Expression of the paralog CitB from *C. crescentus* or the ortholog from *E. coli*, GltA,  
441 in  $\Delta citA$  cells does not reverse the G1→S block either, even though both enzymes exhibit  
442 efficient citrate synthase activity in an *E. coli* reporter system that requires its activity for  
443 growth. The finding that addition of glutamine does not rescue the developmental problem of  
444 a  $\Delta citA$  strain and that metabolite extractions from *citA* mutant cells do not reveal a major  
445 perturbation in the levels of TCAs, provide further support for the conclusion that the *citA*

446 mutant phenotype is not simply caused by a metabolic deficiency of blocked citrate production.  
447 Rather, CitA is a moonlighting protein since that performs a regulatory function that is  
448 genetically separable from enzymatic activity.

449 The role of citrate synthase in development has been noted in other bacteria. *B. subtilis*  
450 cells lacking citrate synthase sporulate poorly (Ireton et al. 1995) and a citrate synthase mutant  
451 of *Streptomyces coelicolor* is unable to erect aerial mycelium (Viollier et al. 2001). Importantly,  
452 while the growth defect of the citrate synthase mutant in *S. coelicolor* on minimal medium was  
453 suppressed by glutamate, development remains perturbed. Thus, developmental events in  
454 bacteria may be controlled by switches and central metabolic enzymes serve as ideal checkpoint  
455 mechanisms that couple developmental gene expression to central metabolism. In this context,  
456 it is noteworthy that enolase in *E. coli* (Aït-Bara and Carpousis 2015) and aconitase in *C.*  
457 *crescentus* (Hardwick et al. 2011) are associated with the RNA degradosome, with the latter  
458 also fulfilling role as RNA binding protein, also in eukaryotic cells (Bandyra and Luisi 2018).  
459 It is also not surprising therefore that in certain organisms a multiplicity of such enzymes exists,  
460 possibly to permit specialization with different functions (e.g. in cell regulation) or to allow  
461 tailoring the metabolic (enzymatic) needs to specialized growth periods.

462 The viability of *C. crescentus*  $\Delta$ *citA* cells, whereas other TCA cycle enzymes seem to  
463 be indispensable for growth, supports our finding that the activity of a second citrate synthase  
464 isoform CitB can support TCA function in the absence of CitA. Since CitA and CitB are both  
465 functional as citrate synthases in a heterologous host such as *E. coli*, the genetic and metabolic  
466 framework for functional specialization of citrate synthases is provided in *C. crescentus*. In  
467 eukaryotic cells like *S. cerevisiae*, it was demonstrated the presence of several paralogs in  
468 different compartments of the cell. CIT1 is located in the mitochondria participating in the  
469 tricarboxylic acid cycle while CIT2 is located in the peroxisome acting in the glyoxylate cycle  
470 (Rosenkrantz et al. 1986; Kim et al. 1986). Interestingly, several bacterial genomes encode

471 parologs of citrate synthase, notably in *B. subtilis* (Jin and Sonenshein 1994) or in *Pseudomonas*  
472 *aeruginosa* (Mitchell 1996). While the presence of several spatially regulated isoform make  
473 sense in eukaryotic cells, the absence of compartments in prokaryotes make unclear why  
474 bacteria encodes several citrate synthase, but could be linked with temporal functions such as  
475 a burst in TCA biosynthetic activity, however *a priori* it is not clear why this could not be  
476 achieved by dual promoter control. Therefore, the presence of paralogs is easiest to reconcile  
477 with functional specialization, that may have evolved from the same structural fold, perhaps  
478 exploiting substrate binding pockets. In this context, it is important to note that in *Podospora*  
479 *anserina*, a citrate synthase mutant strain exhibits a developmental phenotype impairing  
480 meiosis independently of its catalytic citrate synthase activity (Ruprich-Robert et al. 2002),  
481 reminiscent to our finding highlighting the citrate synthase as a key checkpoint in all kingdom  
482 life to co-ordinate cell development and metabolism.

483

484

## 485 **MATERIALS AND METHODS**

### 486 **Strains and growth condition**

487 Strains, plasmids and oligos are listed in Supplemental Table S3, S4 and S5. *C. crescentus*  
488 NA1000 (Marks et al. 2010) and derivatives were cultivated at 30°C in peptone yeast extract  
489 (PYE)-rich medium (2 g/L bactopectone, 1 g/L yeast extract, 1 mM MgSO<sub>4</sub>, and 0.5 mM CaCl<sub>2</sub>)  
490 or in M2 minimal salts supplemented with 0.2% glucose (M2G, 0.87 g/L Na<sub>2</sub>HPO<sub>4</sub>, 0.54 g/L  
491 KH<sub>2</sub>PO<sub>4</sub>, 0.50 g/L NH<sub>4</sub>Cl, 0.2% [wt/vol] glucose, 0.5 mM MgSO<sub>4</sub>, 0.5 mM CaCl<sub>2</sub>, and 0.01  
492 mM FeSO<sub>4</sub>) (Ely 1991). *E. coli* S17-1 *λpir* (Simon et al. 1983) and EC100D (Epicentre  
493 Technologies, Madison, WI ) cells were grown at 37°C in Lysogeny Broth (LB)-rich medium  
494 (10 g/L NaCl, 5 g/L yeast extract, and 10 g/L tryptone). When appropriate, media were  
495 supplemented with antibiotics at the following concentrations (μg/mL in liquid/solid medium

496 for *C. crescentus* strains;  $\mu\text{g.mL}^{-1}$  in liquid/solid medium for *E. coli* strains): kanamycin (5/20  
497  $\mu\text{g.mL}^{-1}$ ; 20/20  $\mu\text{g.mL}^{-1}$ ), tetracycline (1/1  $\mu\text{g mL}^{-1}$ ; not appropriate), spectinomycin and  
498 streptomycin (in solid for *C. crescentus* only) (25/25, five respectively; 30/90  $\mu\text{g.mL}^{-1}$ ),  
499 gentamycin (1/1; 10/25  $\mu\text{g.mL}^{-1}$ ), aztreonam (in solid only) (2.5  $\mu\text{g.mL}^{-1}$ ) and colistin (4  
500  $\mu\text{g.mL}^{-1}$ ). PYE plates containing 3% sucrose were used to select for loss of pNTPS138-derived  
501 plasmids by recombination when constructing mutants by double recombination. When needed,  
502 for *C. crescentus*, D-xylose was added at 0.3% final concentration, glucose at 0.2% final  
503 concentration. Glutamine was used at 9.3mM final in liquid and solid medium.

504 Swarmer cell isolation, electroporation, biparental mating (intergeneric conjugations) and  
505 bacteriophage  $\phi\text{Cr30}$ -mediated generalized transduction were performed as described (Ely  
506 1991) with slight modifications. Briefly, swarmer cells were isolated by Percoll density-  
507 gradient centrifugation at 4°C, followed by three washes and final re-suspension in pre-warmed  
508 (30°C) PYE. Electroporation was done from 1 mL overnight culture that had been washed three  
509 times in sterile water. Biparental matings were done using exponential phase *E. coli* S17-1  
510 donor cells and *C. crescentus* recipient cells washed in PYE and mixed at 1:3 ratio on a PYE  
511 plate. After 4–5 hours of incubation at 30°C, the mixture of cells was plated on PYE harboring  
512 aztreonam (to counter select *E. coli*) and the antibiotic that the conjugated plasmid confers  
513 resistance to. Generalized transductions using  $\phi\text{Cr30}$  were done by mixing 50  $\mu\text{L}$  ultraviolet-  
514 inactivated  $\phi\text{Cr30}$  lysate with 500  $\mu\text{L}$  stationary phase recipient cells, incubation for 2 hr,  
515 followed by plating on PYE containing antibiotic to select for the transduced DNA.

## 516 **Metabolite extraction**

517 For metabolite extraction, *C. crescentus* were grown overnight at 30°C in PYE medium  
518 and diluted to reach an OD<sub>600nm</sub>~0.4. 10 mL of cell culture were centrifuged at 2000g for 5  
519 minutes at 4°C. Metabolism was then quenched by resuspending the pellet in 1 mL of precooled

520 methanol/H<sub>2</sub>O (80:20 (vol/vol), kept at ~ -20°C). Cells were subjected to lysis by five  
521 thaw/freeze (40°C/-80°C) cycles. Cellular debris was removed by centrifugation at 17,000g for  
522 20 minutes at 4°C. Metabolite extracts were kept at -80°C prior to analysis on LC-MS. Bacterial  
523 biomass of individual samples was determined for normalization. The supernatants were  
524 completely evaporated using a SpeedVac (ThermoFisher, Langenselbold, Germany) and  
525 metabolite extracts were reconstituted in 100 µL acetonitrile:H<sub>2</sub>O 50:50. Quality control (QC)  
526 and diluted QC (dQC, diluted by 50%) samples were prepared by pooling equivalent volumes  
527 of all reconstituted samples and injected at a regular interval of 5 samples to assess analytical  
528 variability.

529

### 530 **Liquid Chromatography- High Resolution Mass Spectrometry (LC-HRMS) analysis**

531 LC experiments were performed on a Waters H-Class Acquity UPLC system composed  
532 of a quaternary pump, an auto-sampler including a 15 µL flow-through-needle injector and a  
533 two-way column manager (Waters, Milford, USA) for which temperatures were set at 7 °C and  
534 40°C respectively. The injected volume was 10 µL. Samples were analyzed with a hydrophilic  
535 liquid interaction chromatography (HILIC) SeQuant Zic-pHILIC column (150 x 2.1 mm, 5 µm)  
536 and the appropriate guard kit. For mobile phases, solvent A was acetonitrile and solvent B was  
537 H<sub>2</sub>O containing 2.8 mM ammonium formate adjusted at pH 9.00. Column flow rate was set at  
538 300 µL.min<sup>-1</sup>. The following gradient was applied: 5% B for one minute, increased to 51% B  
539 over 9 minutes, holding for 3 minutes at 51% B and then returning back to 5% B in 0.1 minutes  
540 and re-equilibrating the column for 6.9 minutes. The UPLC system was coupled to a TWIMS-  
541 QTOF high resolution HRMS (Vion, Waters, Manchester, UK) through an electrospray  
542 ionization (ESI) interface. Analyses were performed in negative ESI mode and continuum data  
543 in the range of 50 - 1000 m/z were acquired with a scan time of 0.2 seconds. The ESI parameters  
544 were respectively set as follows: capillary voltage was -2.0 kV, source and desolvation

545 temperatures were set at 120 and 500 °C, cone and desolvation gas flow were 50 and 800 L/h.  
546 Velocity and height of StepWave1 and StepWave2 were set to 300 m/s and 5 V and to 200 m/s  
547 and 30 V, respectively. The high definition MS<sup>E</sup> (HDMS<sup>E</sup>, using ion mobility) settings  
548 consisted of trap wave velocity at 100 m/s; trap pulse height A at 10 V; trap pulse height B at  
549 5 V; IMS wave velocity at 250 m/s; IMS pulse height at 45 V; wave delay set at 20 pushes and  
550 gate delay at 0 m/s. Gas flows of ion mobility instrument were set to 1.60 L/minute for trap gas,  
551 and 25 mL/min for IMS gas. Buffer gas was nitrogen. Fragmentation was performed in HDMS<sup>E</sup>  
552 mode. For the collision energy, 6.0 eV was used for low energy and high energy was a ramp  
553 from 10 to 60 eV. Nitrogen was used as collision gas. Leucine-enkephalin served as a lock-  
554 mass (554.2615 m/z for ESI-) infused at 5-minute intervals. The CCS and mass calibration of  
555 the instrument were done with the calibration mix “Major mix IMS-TOF calibration” (Waters,  
556 Manchester, UK). UNIFI v1.9.3 was used for data acquisition and data treatment.

557

### 558 **Analysis of raw LC-MS data**

559 Run alignment, peak picking, adduct deconvolution and feature annotation were  
560 sequentially performed on Progenesis QI v2.3 (Nonlinear Dynamics, Waters, Newcastle upon  
561 Tyne, UK). Detected peaks were annotated with regard to a set of pure reference standards  
562 (MSMLS Library of Standards, Sigma-Aldrich) measured under the same experimental  
563 conditions as described elsewhere (Pezzatti et al. 2019b). The following tolerances were used:  
564 2.5 ppm for precursor and fragment mass, 10% for retention time (Rt) and 5 % in the case of  
565 collisional cross section (CCS). Data processing was achieved by SUPreMe, an in-house  
566 software with capabilities for drift correction, noise filtering and sample normalization. Finally,  
567 data were transferred to SIMCA-P 15.0 software (Umetrics, Umea, Sweden) for multi-variate  
568 analysis (MVA).

### 569 **Microscopy and image analysis**

570 Exponential phase *C. crescentus* cells cultivated in PYE were immobilized on a thin layer  
571 of 1.2% agarose. For *C. crescentus* time-lapse experiments, cells were first synchronized by  
572 Percoll density-gradient centrifugation and then immobilized on a thin layer of 1.2% agarose  
573 in PYE. Fluorescence and contrast microscopy images were taken with a phase contrast  
574 objective (Zeiss, alpha plan achromatic 100X/1.46 oil phase 3) on an Axio Imager M2  
575 microscope (Zeiss) with appropriate filter (Visitron Systems GmbH) and a cooled CCD camera  
576 (Photometrics, CoolSNAP HQ2) controlled through Metamorph (Molecular Devices). Images  
577 were acquired and processed with ImageJ via Fiji software (Schneider et al. 2012; Schindelin  
578 et al. 2012). To perform cell segmentation and tracking, images were processed using MicrobeJ  
579 (Ducret et al. 2016). Statistics were performed on experiments performed in triplicate  
580 representing more than 300 cells.

### 581 **Genome-wide transposon mutagenesis coupled to deep-sequencing (Tn-Seq)**

582 Pools of >100,000 Tn mutants were isolated as kanamycin-aztreonam or kanamycin-  
583 colistin resistant clones in the NA1000 (WT),  $\Delta tipN$ ,  $\Delta cpdR::\Omega$  backgrounds, with the same  
584 protocol as previously described using a mini-*himar1* Tn encoding kanamycin resistance  
585 (Viollier et al. 2004). For each Tn pool, chromosomal DNA was extracted and used to generate  
586 a Tn-Seq library sequenced on an Illumina HiSeq 2500 sequencer (Fasteris, Geneva,  
587 Switzerland). The single-end sequence reads (50 bp) stored in FastQ files were mapped against  
588 the genome of *Caulobacter crescentus* NA1000 (NC\_011916) (Marks et al. 2010) genome and  
589 converted to BED files using BWA-MEM and bedtools BAM to BED tools respectively from  
590 the Galaxy server (<https://usegalaxy.org/>). The resulting BED file was imported into SeqMonk  
591 (<http://www.bioinformatics.babraham.ac.uk/projects/seqmonk/>) to build sequence read  
592 profiles. The initial quantification of the sequencing data was done in SeqMonk: the genome  
593 was subdivided into 50 bp probes, and for every probe we calculated a value that represents a  
594 normalized read number per million. A ratio for each 50bp position was done between the reads



595 obtained in the  $\Delta tipN$  or  $\Delta cpdR$  strains to the *WT* reads. This file was used to generate the  
596 zoomed panels of the *popA*, *rcdA* and *cpdR* loci (Figure 1B) or the *tipN* locus (Figure 1- Figure  
597 supplemental 1A and 1B).

598

### 599 **Identification of *citA* (*pilA*-*nptII* suppressors)**

600 The *citA*::Tn insertion was identified using a modification of the kanamycin resistance  
601 suppressor screen (Radhakrishnan et al. 2010). Briefly, we screened for mini-*himar1* Tn  
602 insertions that restore  $P_{pilA}$  firing to  $\Delta tipN \Delta cpdR$  double mutant cells harboring the  $P_{pilA}$ -*nptII*  
603 transcriptional reporter that confers kanamycin resistance to 20  $\mu\text{g ml}^{-1}$  when *PpilA* is fully  
604 active. The Tn encodes gentamycin resistance on plasmid pMar2xT7 was delivered from *E.*  
605 *coli* S17-1  $\lambda pir$  (Liberati et al. 2006) to  $\Delta tipN \Delta cpdR pilA::P_{pilA}$ -*nptII* *C. crescentus* cells by  
606 selected on plates gentamycin (1  $\mu\text{g ml}^{-1}$ ), kanamycin (20  $\mu\text{g ml}^{-1}$ ) and aztreonam (2.5  $\mu\text{g ml}^{-1}$ ,  
607 to counter-select *E. coli*). This screen gave rise to one isolate  $\Phi 40$  with the desired resistance  
608 profile. The Tn insertion in  $\Phi 40$  was mapped to the uncharacterized *CCNA\_01983* gene at  
609 nucleotide (nt) position 1061847 of the *C. crescentus* NA1000 genome sequence using  
610 arbitrarily primed PCR (Liberati et al. 2006).

611

### 612 **Evolution experiment**

613 Two independent clones freshly transduced *C. crescentus* NA1000 with  $\Delta citA::kan$  or  
614 *citA*::Tn were inoculated in 3mL of PYE. Stationary phase cultures were diluted in 3 mL PYE  
615 to an optical density  $OD_{600\text{nm}} \sim 0.02$ . After 2 days, the 4 cultures were re-diluted to an  $OD_{600\text{nm}}$   
616  $\sim 0.001$  in 3 mL PYE. The phenotype of each strain was checked by phase contrast microscopy  
617 and FACS analysis. Each culture was streaked on a PYE plate and one single colony from each  
618 culture was grown overnight and chromosomal DNA was extracted. Three suppressors were  
619 subjected to whole-genome sequencing. Library preparation and sequencing were performed

620 by the Genomic platform iGE3 at the university of Geneva on a HiSeq 2500 with 50bp paired-  
621 end reads. Data analysis to identify mutations was done using freebayes v1.1.0-3 (Garrison and  
622 Marth 2012) against the *C. crescentus* NA1000 reference genome (NC\_011916.1).

623

#### 624 **Growth curve**

625 The overnight cultures were started in PYE or in M2G. The cultures were diluted to obtain  
626 an OD<sub>600nm</sub> of 0.1 in PYE or M2G and were incubated at 30°C with a continuous shaking in a  
627 microplate reader (Synergy H1, Biotek). The OD<sub>600nm</sub> was recorded every 30 minutes for 30  
628 hours. The graph represents the trend of the growth curve of three independent experiments.

629

#### 630 **Fluorescence-activated cell sorting (FACS)**

631 Cells in exponential growth phase (OD<sub>600</sub>, 0.3 to 0.6) were fixed 1:10 (vol/vol) in ice-  
632 cold 70% ethanol solution and stored at -20 °C until further use. For rifampicin treatment, the  
633 mid-log phase cells were grown in the presence of 20 µg/mL rifampicin at 30°C for 3 hours.  
634 Cells were fixed as mentioned above. Fixed cells were centrifuged at 6200g for 3 minutes at  
635 room temperature and washed once in FACS staining buffer (pH 7.2; 10 mM Tris-HCl, 1 mM  
636 EDTA, 50 mM Na-citrate, 0.01% Triton X-100). Then, cells were centrifuged at 6200g for 3  
637 minutes at room temperature, resuspended in FACS staining buffer containing RNase A  
638 (Roche) at 0.1 mg.mL<sup>-1</sup> for 30 minutes at room temperature. Cells were stained in FACS  
639 staining buffer containing 0.5 µM of SYTOX green nucleic acid stain solution (Invitrogen) and  
640 then analyzed using a BD Accuri C6 flow cytometer instrument (BD Biosciences, San Jose,  
641 CA, United States). Flow cytometry data were acquired and analyzed using the CFlow Plus  
642 v1.0.264.15 software (Accuri Cytometers Inc.). A total of 20,000 cells were analyzed from each  
643 biological sample, performed in triplicates. The green fluorescence (FL1-A) parameters was  
644 used to determine cell chromosome contents. Flow cytometry profiles within one figure were

645 recorded in the same experiment, on the same day with the same settings. The scales of y- and  
646 x-axes of the histograms within one figure panel are identical. Each experiment was repeated  
647 independently three times and representative results are shown. The relative chromosome  
648 number was directly estimated from the FL1-A value of NA1000 cells treated with 20 µg/mL  
649 rifampicin for 3 hours at 30°C. Rifampicin treatment of cells blocks the initiation of  
650 chromosomal replication but allows ongoing rounds of replication to finish.

### 651 **Whole-cell extracts preparation**

652 Five hundred µL of an exponential *Caulobacter* or *E. coli* cells ( $OD_{600nm} = 0.4$  and  $0.8$   
653 respectively) were harvested with 20,000g at 4°C for 5 minutes. Whole-cell extracts were  
654 prepared by resuspension of cell pellets in 75 µL TE buffer (10 mM Tris-HCl pH 8.0 and 1 mM  
655 EDTA) followed by addition of 75 µL loading buffer 2X (0.25 M Tris pH 6.8, 6% (wt/vol)  
656 SDS, 10 mM EDTA, 20% (vol/vol) Glycerol) containing 10% (vol/vol) β-mercaptoethanol.  
657 Samples were normalized for equivalent loading using  $OD_{600nm}$  and were heated for 10 minutes  
658 at 90°C prior to loading.

659

### 660 **Immunoblot analysis**

661 Protein samples were separated by SDS–polyacrylamide gel electrophoresis and blotted  
662 on polyvinylidene fluoride membranes (Merck Millipore). Membranes were blocked overnight  
663 with Tris-buffered saline 1X (TBS) (50 mM Tris-HCl, 150 mM NaCl, pH 8) containing, 0.1%  
664 Tween-20 and 8% dry milk and then incubated for an additional three hours with the primary  
665 antibodies diluted in TBS 1X, 0.1% Tween-20, 5% dry milk. The different polyclonal antisera  
666 to CitA (1:5,000), CtrA (1:5,000) were used. Primary antibodies were detected using HRP-  
667 conjugated donkey anti-rabbit antibody (Jackson ImmunoResearch) with ECL Western  
668 Blotting Detection System (GE Healthcare) and a luminescent image analyzer (Chemidoc™  
669 MP, Biorad).

## 670 **CitA purification and production of antibodies**

671 Recombinant CitA protein was expressed as an N-terminally His<sub>6</sub>-tagged variant from  
672 pET28a in *E. coli* BL21(DE3)/ pLysS and purified under native conditions using Ni<sup>2+</sup> chelate  
673 chromatography. Cells were grown in LB at 37°C to an OD<sub>600nm</sub> of 0.6 and induced by the  
674 addition of IPTG to 1 mM for 3 hours and harvested at 5000 RPM at 4°C for 30 minutes. Cells  
675 were pelleted and re-suspended in 25 mL of lysis buffer (10 mM Tris HCl (pH 8), 0.1 M NaCl,  
676 1.0 mM β-mercaptoethanol, 5% glycerol, 0.5 mM imidazole Triton X-100 0.02%). Cells were  
677 sonicated in a water-ice bath, 15 cycles of 30 seconds ON; 30 seconds OFF. After  
678 centrifugation at 5000g for 20 minutes at 4°C, the supernatant was loaded onto a column  
679 containing 5 mL of Ni-NTA agarose resin (Qiagen, Hilden, Germany) pre-equilibrated with  
680 lysis buffer. The column was rinsed with lysis buffer, 400 mM NaCl and 10 mM imidazole,  
681 both prepared in lysis buffer. Fractions were collected (in 300 mM Imidazole buffer, prepared  
682 in lysis buffer) and used to immunize New Zealand white rabbits (Josman LLC).

683

## 684 **Strain construction**

### 685 **MB3075 (NA1000 Δ*tipN* Δ*popA*)**

686 A pNTPS138 derivative (pNTPS138-Δ*tipN*) (Huitema et al. 2006) was integrated nearby  
687 the marker-less Δ*tipN* mutation by homologous recombination. Phage φCr-30-mediated  
688 generalized transduction was used to transfer the mutant Δ*tipN* allele into the recipients  
689 NA1000 Δ*popA* by selecting for kanamycin resistance. Clones that have lost pNTPS138-Δ*tipN*  
690 by homologous recombination were probed for kanamycin resistance (on PYE plates  
691 supplemented with kanamycin) following sucrose counter-selection. PCR was used to verify  
692 the integrity of the mutants.

693

### 694 **MB3079 (NA1000 Δ*tipN* Δ*rcdA*::Ω)**

695 A pNTPS138 derivative (pNTPS138- $\Delta tipN$ ) (Huitema et al. 2006) was integrated nearby  
696 the marker-less  $\Delta tipN$  mutation by homologous recombination. Phage  $\phi Cr$ -30-mediated  
697 generalized transduction was used to transfer the mutant  $\Delta tipN$  allele into the recipients  
698 NA1000;  $\Delta rcdA::\Omega$  by selecting for kanamycin resistance. Clones that have lost pNTPS138-  
699  $\Delta tipN$  by homologous recombination were probed for kanamycin resistance (on PYE plates  
700 supplemented with kanamycin) following sucrose counter-selection. PCR was used to verify  
701 the integrity of the mutants.

702

703 **MB2017 (NA1000  $\Delta tipN \Delta cpdR::tet$ )**

704 The  $\Delta cpdR::tet$  allele was introduced into NA1000  $\Delta tipN$  by generalized transduction  
705 using  $\phi Cr$ 30 and then selected on PYE plates containing tetracycline.

706

707 **MB2366 (NA1000  $\Delta tipN xylX::kidO^{AA::DD}$ )**

708 The  $xylX::kidO^{AA::DD}$  ( $kan^R$ ) allele was introduced into NA1000  $\Delta tipN$  by generalized  
709 transduction using  $\phi Cr$ 30 and then selected on PYE plates containing kanamycin.

710

711 **MB2720 (NA1000  $\Delta tipN \Delta cpdR::tet \Delta kidO$ )**

712 A pNTPS138 derivative (pNTPS138- $\Delta tipN$ ) (Huitema et al. 2006) was integrated nearby  
713 the marker-less  $\Delta tipN$  mutation by homologous recombination.  $\phi Cr$ -30-mediated generalized  
714 transduction was used to transfer the mutant  $\Delta tipN$  allele into the recipients NA1000  $\Delta kidO$  by  
715 selecting for kanamycin resistance. Clones that have lost pNTPS138- $\Delta tipN$  by homologous  
716 recombination were probed for kanamycin resistance (on PYE plates supplemented with  
717 kanamycin) following sucrose counter-selection. PCR was used to verify the integrity of the  
718 mutants. Then,  $\Delta cpdR::tet$  allele was introduced into NA1000  $\Delta tipN \Delta kidO$  by transduction  
719 using  $\phi Cr$ 30 and then selected on PYE plates containing tetracycline.

720

721 **MB2325 (NA1000 *pilA::P<sub>pilA</sub>-GFP*)**

722 The *pilA::P<sub>pilA</sub>-GFP* (kan<sup>R</sup>) allele was introduced into NA1000 by generalized  
723 transduction using  $\phi$ Cr30 and then selected on PYE plates containing kanamycin.

724

725 **MB2327 (NA1000  $\Delta$ *cpdR:: $\Omega$  pilA::P<sub>pilA</sub>-GFP*)**

726 The *pilA::P<sub>pilA</sub>-GFP* (kan<sup>R</sup>) allele was introduced into NA1000  $\Delta$ *cpdR:: $\Omega$*  (Spc<sup>R</sup>) by  
727 generalized transduction using  $\phi$ Cr30 and then selected on PYE plates containing kanamycin.

728

729 **MB2329 (NA1000  $\Delta$ *tipN pilA::P<sub>pilA</sub>-GFP*)**

730 The *pilA::P<sub>pilA</sub>-GFP* (kan<sup>R</sup>) allele was introduced into NA1000  $\Delta$ *tipN* by generalized  
731 transduction using  $\phi$ Cr30 and then selected on PYE plates containing kanamycin.

732

733 **MB2331 (NA1000  $\Delta$ *tipN*  $\Delta$ *cpdR:: $\Omega$  pilA::P<sub>pilA</sub>-GFP*)**

734 The *pilA::P<sub>pilA</sub>-GFP* (kan<sup>R</sup>) allele was introduced into MB2017 (NA1000  $\Delta$ *tipN*  
735  $\Delta$ *cpdR:: $\Omega$* ) by generalized transduction using  $\phi$ Cr30 and then plated on PYE containing  
736 kanamycin.

737

738 **MB2268 (NA1000 *pilA::P<sub>pilA</sub>-nptII*)**

739 The *pilA::P<sub>pilA</sub>-nptII* (Spc<sup>R</sup>) allele was introduced into NA1000 by generalized  
740 transduction using  $\phi$ Cr30 and then selected on PYE plates containing spectinomycin.

741

742 **MB2271 (NA1000  $\Delta$ *tipN*  $\Delta$ *cpdR::tet pilA::P<sub>pilA</sub>-nptII*)**

743 The *pilA::P<sub>pilA-nptII</sub>* (Spc<sup>R</sup>) allele was introduced into MB2017 (NA1000  $\Delta tipN$   
744  $\Delta cpdR::tet$ ) by generalized transduction using  $\phi Cr30$  and then selected on PYE plates  
745 containing spectinomycin.

746

747 **MB2559 (NA1000  $\Delta citA::pNTPS138\Delta citA$ )**

748 A pNTPS138 derivative (pNTPS138- $\Delta citA$ ) was integrated nearby the marker-less  $\Delta citA$   
749 mutation by homologous recombination.  $\phi Cr-30$ -mediated generalized transduction was used  
750 to transfer the mutant  $\Delta citA$  allele into the recipients NA1000 by selecting for kanamycin  
751 resistance on PYE plates containing kanamycin.

752

753 **MB3056 (NA1000  $\Delta tipN \Delta cpdR::tet citA::Tn pilA::P_{pilA-nptII}$ )**

754 The *citA::Tn* (Gent<sup>R</sup>) allele was introduced into MB2271 (NA1000  $\Delta tipN \Delta cpdR::tet$   
755 *pilA::P<sub>pilA-nptII</sub>*) cells by transduction using  $\phi Cr30$  and then selected on PYE plates containing  
756 gentamycin.

757

758 **MB3058 (NA1000  $\Delta tipN \Delta cpdR::tet \Delta citA pilA::P_{pilA-nptII}$ )**

759  $\phi Cr-30$ -mediated generalized transduction was used to transfer the mutant  $\Delta citA$  allele  
760 from MB2559 into MB2017 (NA1000;  $\Delta tipN \Delta cpdR::tet$ ) recipient cells by selecting for  
761 kanamycin resistance. Clones that have lost pNPTS138- $\Delta citA$  by homologous recombination  
762 were probed for kanamycin resistance (on PYE plates supplemented with kanamycin)  
763 following sucrose counter-selection (giving rise to strain named MB3054. PCR was used to  
764 verify the integrity of the mutants. Then, the *pilA::P<sub>pilA-nptII</sub>* (Spc<sup>R</sup>) allele was introduced into  
765 MB3054 (NA1000  $\Delta tipN \Delta cpdR::tet \Delta citA$ ) by generalized transduction using  $\phi Cr30$ ,  
766 selecting on PYE plates containing spectinomycin.

767

768 **MB2679 (NA1000  $\Delta$ *citBC*)**

769       The markerless  $\Delta$ *citBC* double mutant was created by introducing into the *WT* (NA1000)  
770 using the standard two-step recombination sucrose counter-selection procedure induced by the  
771 pNTPS138- $\Delta$ *citBC* (pMB309). Briefly, first integration was done by matting of the eMB552  
772 (S17-1 carrying the pMB309) and *C. crescentus* NA1000, selecting for kanamycin and  
773 aztreonam (to eliminate the donor strain). Clones that have lost pNTPS138- $\Delta$ *tipN* by  
774 homologous recombination were probed for kanamycin resistance (on PYE plates  
775 supplemented with kanamycin) following sucrose counter-selection (giving rise to strain named  
776 MB2679. PCR, using outside primers that do not hybridize within the  $\Delta$ *citBC* deletion carried  
777 on pNTPS138, was used to verify the integrity of the mutants.

778

779 **MB2622 (NA1000 *citA*::Tn)**

780       The *citA*::Tn (Gent<sup>R</sup>) allele was introduced into NA1000 by generalized transduction  
781 using  $\phi$ Cr30 and then selected on PYE plates containing gentamycin.

782

783 **MB1537 (NA1000; pMT335)**

784       Plasmid pMT335 was introduced into NA1000 by electroporation and then plated on  
785 PYE harboring gentamycin.

786

787 **MB3433 (NA1000  $\Delta$ *citA*; pMT335)**

788        $\phi$ Cr-30-mediated generalized transduction was used to transfer the mutant  $\Delta$ *citA* allele  
789 from MB2559 into MB1537 recipient cells by selecting for kanamycin resistance.

790

791 **MB3435 (NA1000  $\Delta$ *citA*; pMT335-*citA*)**



792 Plasmid pMB302 (pMT335-*citA*) was introduced into NA1000 by electroporation and  
793 then plated on PYE harboring gentamycin.  $\phi$ Cr-30-mediated generalized transduction was used  
794 to transfer the mutant  $\Delta$ *citA* allele from MB2559 into NA1000; pMT335-*citA* cells by selecting  
795 for kanamycin resistance.

796

797 **MB3469 (NA1000  $\Delta$ *citA*; pMT335-*citB*)**

798 Plasmid pMB303 (pMT335-*citB*) was introduced into NA1000 by electroporation and  
799 then plated on PYE harboring gentamycin.  $\phi$ Cr-30-mediated generalized transduction was used  
800 to transfer the mutant  $\Delta$ *citA* allele from MB2559 into NA1000; pMT335-*citB* cells by selecting  
801 for kanamycin resistance.

802

803 **MB3471 (NA1000  $\Delta$ *citA*; pMT335-*citC*)**

804 Plasmid pMB304 (pMT335-*citC*) was introduced into NA1000 by electroporation and  
805 then plated on PYE harboring gentamycin.  $\phi$ Cr-30-mediated generalized transduction was used  
806 to transfer the mutant  $\Delta$ *citA* allele from MB2559 into NA1000; pMT335-*citC* cells by selecting  
807 for kanamycin resistance.

808

809 **MB3473 (NA1000  $\Delta$ *citA*; pMT335-*gltA*)**

810 Plasmid pMB310 (pMT335-*gltA*) was introduced into NA1000 by electroporation and  
811 then plated on PYE harboring gentamycin.  $\phi$ Cr-30-mediated generalized transduction was used  
812 to transfer the mutant  $\Delta$ *citA* allele from MB2559 into NA1000; pMT335-*gltA* cells by selecting  
813 for kanamycin resistance.

814

815 **MB3437 (NA1000  $\Delta$ *citA*; pMT335-*citA*<sup>H303W</sup>)**

816 Plasmid pMB325 (pMT335-*citA*<sup>H303W</sup>) was introduced into NA1000 by electroporation  
817 and then plated on PYE harboring gentamycin.  $\phi$ Cr-30-mediated generalized transduction was  
818 used to transfer the mutant  $\Delta$ *citA* allele from MB2559 into NA1000; pMT335-*citA*<sup>H303W</sup> cells  
819 by selecting for kanamycin resistance.

820

821 **MB3439 (NA1000  $\Delta$ *citA*; pMT335-*citA*<sup>H303A</sup>)**

822 Plasmid pMB326 (pMT335-*citA*<sup>H303A</sup>) was introduced into NA1000 by electroporation  
823 and then plated on PYE harboring gentamycin.  $\phi$ Cr-30-mediated generalized transduction was  
824 used to transfer the mutant  $\Delta$ *citA* allele from MB2559 into NA1000; pMT335-*citA*<sup>H303A</sup> cells  
825 by selecting for kanamycin resistance.

826

827 **MB2452 (NA1000 *parB*::GFP-*parB* *citA*::Tn)**

828 The *citA*::Tn (Gent<sup>R</sup>) allele was introduced into MB557 (NA1000; *parB*::GFP-*parB*) by  
829 generalized transduction using  $\phi$ Cr30 and then plated on PYE plates containing gentamycin.

830

831 **MB3467 (NA1000 *parB*::GFP-*parB*  $\Delta$ *citA*)**

832  $\phi$ Cr-30-mediated generalized transduction was used to transfer the mutant  $\Delta$ *citA* allele  
833 from MB2559 into MB557 (NA1000; *parB*::GFP-*parB*) by selecting for kanamycin resistance  
834 on plates containing kanamycin.

835

836 **MB2413 (NA1000  $\Delta$ *spoT* *citA*::Tn)**

837  $\phi$ Cr-30-mediated generalized transduction was used to transfer the *citA*::Tn allele into  
838 MB2403 (NA1000  $\Delta$ *spoT*) cells by selection on plates PYE containing gentamycin.

839

840 **MB2426 (NA1000  $\Delta$ *ptsP* *citA*::Tn)**

841  $\phi$ Cr-30-mediated generalized transduction was used to transfer the *citA::Tn* allele into  
842 MB2417 (NA1000  $\Delta ptsP$ ) cells by selection on plates PYE containing gentamycin.

843

844 **MB3382 (NA1000  $\Delta tipN \Delta cpdR::tet \Delta spoT \Delta citA$ )**

845 A pNTPS138 derivative (pNTPS138- $\Delta spoT$ ) was integrated nearby the marker-less  
846  $\Delta spoT$  mutation by homologous recombination. Then,  $\phi$ Cr-30-mediated generalized  
847 transduction was used to transfer the mutant  $\Delta spoT$  allele into NA1000  $\Delta tipN$  cells by selecting  
848 for kanamycin resistance. Clones that have lost pNTPS138- $\Delta spoT$  by homologous  
849 recombination were probed for kanamycin resistance (on PYE plates supplemented with  
850 kanamycin) following sucrose counter-selection. PCR was used to verify the integrity of the  
851 mutants.  $\phi$ Cr30-mediated generalized transduction was then used to transfer the mutant  $\Delta citA$   
852 allele from MB2559 into NA1000  $\Delta tipN \Delta spoT$  recipient cells by selecting for kanamycin  
853 resistance. Finally,  $\Delta cpdR::tet$  allele was introduced into NA1000  $\Delta tipN \Delta spoT \Delta citA$  recipient  
854 cells by transduction using  $\phi$ Cr30, followed by selection on PYE plates containing tetracycline.

855

856 **MB3386 (NA1000  $\Delta tipN \Delta cpdR::tet \Delta spoT \Delta citA$ )**

857 A pNTPS138 derivative (pNTPS138- $\Delta ptsP$ ) was integrated nearby the marker-less  $\Delta ptsP$   
858 mutation by homologous recombination.  $\phi$ Cr-30-mediated generalized transduction was used  
859 to transfer the mutant  $\Delta ptsP$  allele into the recipients NA1000  $\Delta tipN$  by selecting for kanamycin  
860 resistance. Clones that have lost pNTPS138- $\Delta ptsP$  by homologous recombination were probed  
861 for kanamycin resistance (on PYE plates supplemented with kanamycin) following sucrose  
862 counter-selection. PCR was used to verify the integrity of the mutants. A pNTPS138 derivative  
863 (pNTPS138- $\Delta citA$ ) was integrated nearby the marker-less  $\Delta citA$  mutation by homologous  
864 recombination.  $\phi$ Cr-30-mediated generalized transduction was then used to transfer the mutant  
865  $\Delta citA$  allele into NA1000  $\Delta tipN \Delta ptsP$  recipient cells by selecting for kanamycin resistance. No

866 counterselection was done. Finally,  $\Delta cpdR::tet$  allele was introduced into NA1000  $\Delta tipN \Delta ptsP$   
867  $\Delta citA$  by transduction using  $\phi Cr30$ , followed by selection on PYE plates containing  
868 tetracycline.

869

870 **MB3366 (NA1000  $\Delta tipN \Delta cpdR::tet xylX::relA'$ -flag)**

871 The  $xylX::relA'$  (GentR) allele was introduced into NA1000  $\Delta tipN$ ; by transduction using  
872  $\phi Cr30$  and then plated on PYE harboring gentamycin. Then,  $\Delta cpdR::tet$  allele was introduced  
873 into NA1000;  $\Delta tipN xylX::relA'$  by transduction using  $\phi Cr30$  and then plated on PYE  
874 containing tetracycline.

875

876 **MB3368 (NA1000  $\Delta tipN \Delta cpdR::tet xylX::relA'$ -flag)**

877 The  $xylX::relA^{E335Q}$  (GentR) allele was introduced into NA1000  $\Delta tipN$  cells by  
878 transduction using  $\phi Cr30$ , selected PYE plates containing gentamycin. Then, the  $\Delta cpdR::tet$   
879 allele was introduced into NA1000  $\Delta tipN xylX::relA^{E335Q}$  recipient cells by transduction using  
880  $\phi Cr30$ , selecting on PYE plates containing tetracycline.

881

882 **eMB554 (BW35113; pMT335)**

883 Plasmid pMT335 was introduced into BW35113 by electroporation and then plated on  
884 LB agar containing gentamycin.

885

886 **eMB556 (BW35113;  $\Delta gltA::770$ ; pMT335)**

887 Plasmid pMT335 was introduced into JW0710-1 (BW35113;  $\Delta gltA770::kan$ ) by  
888 electroporation and then plated on LB agar containing gentamycin.

889

890 **eMB558 (BW35113;  $\Delta gltA::770$ ; pMT335-*citA*)**

891 Plasmid pMB302 (pMT335-*citA*) was introduced into JW0710-1 (BW35113;  
892  $\Delta$ *gltA770::kan*) by electroporation and then plated on LB agar containing gentamycin.

893

894 **eMB560 (BW35113;  $\Delta$ *gltA::770*; pMT335-*citB*)**

895 Plasmid pMB303 (pMT335-*citB*) was introduced into JW0710-1 (BW35113;  
896  $\Delta$ *gltA770::kan*) by electroporation and then plated on LB agar containing gentamycin.

897

898 **eMB562 (BW35113;  $\Delta$ *gltA::770*; pMT335-*citC*)**

899 Plasmid pMB304 (pMT335-*citC*) was introduced into JW0710-1 (BW35113;  
900  $\Delta$ *gltA770::kan*) by electroporation and then plated on LB agar containing gentamycin.

901

902 **eMB564 (BW35113;  $\Delta$ *gltA::770*; pMT335-*gltA*)**

903 Plasmid pMB310 (pMT335-*gltA*) was introduced into JW0710-1 (BW35113;  
904  $\Delta$ *gltA770::kan*) by electroporation and then plated on LB agar containing gentamycin.

905

906 **eMB581 (BW35113;  $\Delta$ *gltA::770*; pMT335-*citA*<sup>H303W</sup>)**

907 Plasmid pMB325 (pMT335-*citA*<sup>H303W</sup>) was introduced into JW0710-1 (BW35113;  
908  $\Delta$ *gltA770::kan*) by electroporation and then plated on LB agar containing gentamycin.

909

910 **eMB581 (BW35113;  $\Delta$ *gltA::770*; pMT335-*citA*<sup>D361E</sup>)**

911 Plasmid pMB327 (pMT335-*citA*<sup>D361E</sup>) was introduced into JW0710-1 (BW35113;  
912  $\Delta$ *gltA770::kan*) by electroporation and then plated on LB agar containing gentamycin.

913

914 **Plasmid constructions**

915 **pMB278 (pNTPS138- $\Delta$ *citA*)**

916 The plasmid construct used to delete *citA* (*CCNA\_01983*) was made by PCR  
917 amplification of two fragments. The first to amplify the upstream region of *citA*, a 617 bp  
918 fragment was amplified using primers OMB173 and OMB174, flanked by an *HindIII* and a *PstI*  
919 site. The second to amplify the downstream region of *citA*, a 567 bp fragment was amplified  
920 using primers OMB175 and OMB176, flanked by a *PstI* site and an *EcoRI* site. These two  
921 fragments were first digested with appropriate restriction enzymes and then triple ligated into  
922 pNTPS138 (M.R.K. Alley, Imperial College London, unpublished) previously restricted with  
923 *EcoRI/HindIII*.

924

#### 925 **pMB288 (pNTPS138- $\Delta$ *citB*)**

926 The plasmid construct used to delete *citB* (*CCNA\_03757*) was made by PCR  
927 amplification of two fragments. The first to amplify the upstream region of *citB*, a 550 bp  
928 fragment was amplified using primers OMB184 and OMB185, flanked by a *HindII* and an  
929 *NdeI*. The second to amplify the downstream region of *citB*, a 538 bp fragment was amplified  
930 using primers OMB186 and OMB187, flanked by a *NdeI* site and an *EcoRI* site. These two  
931 fragments were first digested with appropriate restriction enzymes and then triple ligated into  
932 pNTPS138 (M.R.K. Alley, Imperial College London, unpublished) previously restricted with  
933 *EcoRI/HindIII*.

934

#### 935 **pMB289 (pNTPS138- $\Delta$ *citC*)**

936 The plasmid construct used to delete *citC* (*CCNA\_03758*) was made by PCR  
937 amplification of two fragments. The first to amplify the upstream region of *citC*, a 568 bp  
938 fragment was amplified using primers OMB188 and OMB189, flanked by a *HindII* and an  
939 *NdeI*. The second to amplify the downstream region of *citC*, a 551 bp fragment was amplified  
940 using primers OMB190 and OMB191, flanked by a *NdeI* site and a *EcoRI* site. These two

941 fragments were first digested with appropriate restriction enzymes and then triple ligated into  
942 pNTPS138 (M.R.K. Alley, Imperial College London, unpublished) previously restricted with  
943 *EcoRI/HindIII*.

944

945 **pMB309 (pNTPS138- $\Delta$ *citB/citC*)**

946 The plasmid construct used to delete *citB* and *citC* (*CCNA\_03757* and *CCNA\_03758*)  
947 was made by digestion of the upstream region of *citB* of the pMB288, a 532 bp fragment using  
948 the *NdeI* and *EcoRI* site. This fragment was ligated into the pMB289 digested by *MfeI* and *NdeI*  
949 enzymes.

950

951 **pMB302 (pMT335-*citA*)**

952 The *citA* coding sequence was PCR amplified from NA1000 using the OMB179 and  
953 OMB182 primers. This fragment was digested with *NdeI/EcoRI* and cloned into *NdeI/EcoRI*-  
954 digested pMT335.

955

956 **pMB303 (pMT335-*citB*)**

957 The *citB* coding sequence was PCR amplified from NA1000 using the OMB194 and  
958 OMB195 primers. This fragment was digested with *NdeI/EcoRI* and cloned into *NdeI/EcoRI*-  
959 digested pMT335.

960

961 **pMB304 (pMT335-*citC*)**

962 The *citC* coding sequence was PCR amplified from NA1000 using the OMB196 and  
963 OMB197 primers. This fragment was digested with *NdeI/EcoRI* and cloned into *NdeI/EcoRI*-  
964 digested pMT335.

965

966 **pMB310 (pMT335-*gltA*)**

967 The *gltA* coding sequence was PCR amplified from *E. coli* MG1655 using the OMB203  
968 and OMB204 primers. This fragment was digested with *NdeI/EcoRI* and cloned into  
969 *NdeI/EcoRI*-digested pMT335.

970

971 **pMB287 (pSC-*citA*)**

972 The *citA* coding sequence was PCR amplified from *C. crescentus* using the OMB179 and  
973 OMB183 primers. This fragment was digested with *NdeI/HindIII* and cloned into *NdeI/HindIII*  
974 digested pSC.

975

976 **pMB325 (pMT335-*citA*<sup>H303W</sup>)**

977 The *citA* catalytic mutant was generated using QuickChange Site-directed Mutagenesis  
978 kit (Agilent technologies). Briefly, the plasmid pMB302 (pMT335-*citA*) was PCR amplified  
979 using the mutagenic primers OMB232 and OMB233, containing the H303W mutation. This  
980 PCR was followed by a *DpnI* digestion allowing to digest the parental plasmid and this  
981 digestion was used to transform electrocompetent *E. coli*. The integration of the site-directed  
982 mutation in *citA* coding sequence was verified by sequencing.

983

984 **pMB326 (pMT335-*citA*<sup>H303A</sup>)**

985 The *citA* catalytic mutant was generated using QuickChange Site-directed Mutagenesis  
986 kit (Agilent technologies). Briefly, the plasmid pMB302 (pMT335-*citA*) was PCR amplified  
987 using the mutagenic primers OMB236 and OMB237, containing the H303A mutation. This  
988 PCR was followed by a *DpnI* digestion allowing to digest the parental plasmid and this  
989 digestion was used to transform electrocompetent *E. coli*. The integration of the site-directed  
990 mutation in *citA* coding sequence was verified by sequencing.



991

992 **AKNOWLEDGMENTS**

993 We thank Justine Collier, Sean Crosson, Martin Thanbichler, Michael Laub, Urs Jenal and Lucy  
994 Shapiro for materials, Julien Prados for help with Tn-Seq and suppressors analyses and Gaël  
995 Panis, Nicolas Kint for critical reading of the manuscript. This paper was supported by the  
996 Swiss National Science Foundatrion grant 31003A\_182576 to Patrick H Viollier.

997 **AUTHOR CONTRIBUTION**

998 MB, Conception and design, Acquisition of data, Analysis and interpretation of data, Drafting  
999 or revising the article, Contributed unpublished essential data or reagents.  
1000 JP, VG Conception and design, Acquisition of data, Analysis and interpretation of data,  
1001 Drafting or revising the article, Contributed unpublished essential data or reagents.  
1002 LD, Conception and design, Acquisition of data, Analysis and interpretation of data,  
1003 Contributed unpublished essential data or reagents.  
1004 SR, Conception and design, Analysis and interpretation of data, Drafting or revising the article.  
1005 PHV, Conception and design, Analysis and interpretation of data, Drafting or revising the  
1006 article.

1007 **REFERENCES**

1008 Aït-Bara S, Carpousis AJ. 2015. RNA degradosomes in bacteria and chloroplasts:  
1009 classification, distribution and evolution of RNase E homologs. *Mol Microbiol* **97**: 1021–1135.  
1010 Ardisson S, Viollier PH. 2015. Interplay between flagellation and cell cycle control in  
1011 *Caulobacter*. *Curr Opin Microbiol* **28**: 83–92.  
1012 Atkinson GC, Tenson T, Hauryliuk V. 2011. The RelA/SpoT Homolog (RSH) Superfamily:  
1013 Distribution and Functional Evolution of ppGpp Synthetases and Hydrolases across the Tree of  
1014 Life. *PLOS ONE* **6**: e23479.

- 1015 Ausmees N, Jacobs-Wagner C. 2003. Spatial and Temporal Control of Differentiation and Cell  
1016 Cycle Progression in *Caulobacter Crescentus*. *Annu Rev Microbiol* **57**: 225–247.
- 1017 Baba T, Ara T, Hasegawa M, Takai Y, Okumura Y, Baba M, Datsenko KA, Tomita M, Wanner  
1018 BL, Mori H. 2006. Construction of *Escherichia coli* K-12 in-frame, single-gene knockout  
1019 mutants: the Keio collection. *Mol Syst Biol* **2**: 2006.0008.
- 1020 Bandyra KJ, Luisi BF. 2018. RNase E and the High-Fidelity Orchestration of RNA Metabolism.  
1021 *Microbiol Spectr* **6**.
- 1022 Beaufay F, Coppine J, Mayard A, Laloux G, Bolle XD, Hallez R. 2015. A NAD-dependent  
1023 glutamate dehydrogenase coordinates metabolism with cell division in *Caulobacter crescentus*.  
1024 *EMBO J* **34**: 1786–1800.
- 1025 Bergé M, Campagne S, Mignolet J, Holden S, Théraulaz L, Manley S, Allain FH-T, Viollier  
1026 PH. 2016. Modularity and determinants of a (bi-)polarization control system from free-living  
1027 and obligate intracellular bacteria. *eLife* **5**: e20640.
- 1028 Bergé M, Viollier PH. End-in-Sight: Cell Polarization by the Polygamie Organizer PopZ.  
1029 *Trends Microbiol*.
- 1030 Biondi EG, Reisinger SJ, Skerker JM, Arif M, Perchuk BS, Ryan KR, Laub MT. 2006.  
1031 Regulation of the bacterial cell cycle by an integrated genetic circuit. *Nature* **444**: 899.
- 1032 Boutte CC, Henry JT, Crosson S. 2012. ppGpp and Polyphosphate Modulate Cell Cycle  
1033 Progression in *Caulobacter crescentus*. *J Bacteriol* **194**: 28–35.
- 1034 Bowman GR, Comolli LR, Zhu J, Eckart M, Koenig M, Downing KH, Moerner WE, Earnest  
1035 T, Shapiro L. 2008. A Polymeric Protein Anchors the Chromosomal Origin/ParB Complex at

- 1036 a Bacterial Cell Pole. *Cell* **134**: 945–955.
- 1037 Britos L, Abeliuk E, Taverner T, Lipton M, McAdams H, Shapiro L. 2011. Regulatory  
1038 Response to Carbon Starvation in *Caulobacter crescentus*. *PLOS ONE* **6**: e18179.
- 1039 Christen B, Abeliuk E, Collier JM, Kalogeraki VS, Passarelli B, Collier JA, Fero MJ, McAdams  
1040 HH, Shapiro L. 2011. The essential genome of a bacterium. *Mol Syst Biol* **7**: 528.
- 1041 Commichau FM, Stülke J. 2015. Trigger Enzymes: Coordination of Metabolism and Virulence  
1042 Gene Expression. *Microbiol Spectr* **3**.
- 1043 De Nisco NJ, Abo RP, Wu CM, Penterman J, Walker GC. 2014. Global analysis of cell cycle  
1044 gene expression of the legume symbiont *Sinorhizobium meliloti*. *Proc Natl Acad Sci U S A*  
1045 **111**: 3217–3224.
- 1046 Deutscher J, Aké FMD, Derkaoui M, Zébré AC, Cao TN, Bouraoui H, Kentache T, Mokhtari  
1047 A, Milohanic E, Joyet P. 2014. The Bacterial Phosphoenolpyruvate:Carbohydrate  
1048 Phosphotransferase System: Regulation by Protein Phosphorylation and Phosphorylation-  
1049 Dependent Protein-Protein Interactions. *Microbiol Mol Biol Rev* **78**: 231–256.
- 1050 Domian IJ, Quon KC, Shapiro L. 1997. Cell Type-Specific Phosphorylation and Proteolysis of  
1051 a Transcriptional Regulator Controls the G1-to-S Transition in a Bacterial Cell Cycle. *Cell* **90**:  
1052 415–424.
- 1053 Ducret A, Quardokus EM, Brun YV. 2016. MicrobeJ, a tool for high throughput bacterial cell  
1054 detection and quantitative analysis. *Nat Microbiol* **1**: 16077.
- 1055 Duerig A, Abel S, Folcher M, Nicollier M, Schwede T, Amiot N, Giese B, Jenal U. 2009.  
1056 Second messenger-mediated spatiotemporal control of protein degradation regulates bacterial

- 1057 cell cycle progression. *Genes Dev* **23**: 93–104.
- 1058 Ebersbach G, Briegel A, Jensen GJ, Jacobs-Wagner C. 2008. A Self-Associating Protein  
1059 Critical for Chromosome Attachment, Division, and Polar Organization in *Caulobacter*. *Cell*  
1060 **134**: 956–968.
- 1061 Ely B. 1991. Genetics of *Caulobacter crescentus*. *Methods In Enzymology* **204**: 372–384.
- 1062 England JC, Perchuk BS, Laub MT, Gober JW. 2010. Global Regulation of Gene Expression  
1063 and Cell Differentiation in *Caulobacter crescentus* in Response to Nutrient Availability. *J*  
1064 *Bacteriol* **192**: 819–833.
- 1065 Evinger M, Agabian N. 1977. Envelope-associated nucleoid from *Caulobacter crescentus*  
1066 stalked and swarmer cells. *J Bacteriol* **132**: 294–301.
- 1067 Fumeaux C, Radhakrishnan SK, Ardisson S, Théraulaz L, Frandi A, Martins D, Nesper J, Abel  
1068 S, Jenal U, Viollier PH. 2014. Cell cycle transition from S-phase to G1 in *Caulobacter* is  
1069 mediated by ancestral virulence regulators. *Nat Commun* **5**: 4081.
- 1070 Garrison E, Marth G. 2012. Haplotype-based variant detection from short-read sequencing.  
1071 *ArXiv12073907 Q-Bio*.
- 1072 Goley ED, Iniesta AA, Shapiro L. 2007. Cell cycle regulation in *Caulobacter*: location, location,  
1073 location. *J Cell Sci* **120**: 3501–3507.
- 1074 Goley ED, Yeh Y-C, Hong S-H, Fero MJ, Abeliuk E, McAdams HH, Shapiro L. 2011.  
1075 Assembly of the *Caulobacter* cell division machine. *Mol Microbiol* **80**: 1680–1698.
- 1076 Gonzalez D, Collier J. 2014. Effects of (p)ppGpp on the Progression of the Cell Cycle of  
1077 *Caulobacter crescentus*. *J Bacteriol* **196**: 2514–2525.

- 1078 Gorbatyuk B, Marczyński GT. 2005. Regulated degradation of chromosome replication  
1079 proteins DnaA and CtrA in *Caulobacter crescentus*. *Mol Microbiol* **55**: 1233–1245.
- 1080 Handford PA, Ner SS, Bloxham DP, Wilton DC. 1988. Site-directed mutagenesis of citrate  
1081 synthase; the role of the active-site aspartate in the binding of acetyl-CoA but not oxaloacetate.  
1082 *Biochim Biophys Acta* **953**: 232–240.
- 1083 Hardwick SW, Chan VSY, Broadhurst RW, Luisi BF. 2011. An RNA degradosome assembly  
1084 in *Caulobacter crescentus*. *Nucleic Acids Res* **39**: 1449–1459.
- 1085 Huberts DHEW, van der Klei IJ. 2010. Moonlighting proteins: An intriguing mode of  
1086 multitasking. *Biochim Biophys Acta BBA - Mol Cell Res* **1803**: 520–525.
- 1087 Huitema E, Pritchard S, Matteson D, Radhakrishnan SK, Viollier PH. 2006. Bacterial Birth  
1088 Scar Proteins Mark Future Flagellum Assembly Site. *Cell* **124**: 1025–1037.
- 1089 Iniesta AA, McGrath PT, Reisenauer A, McAdams HH, Shapiro L. 2006. A phospho-signaling  
1090 pathway controls the localization and activity of a protease complex critical for bacterial cell  
1091 cycle progression. *Proc Natl Acad Sci* **103**: 10935–10940.
- 1092 Iniesta AA, Shapiro L. 2008. A bacterial control circuit integrates polar localization and  
1093 proteolysis of key regulatory proteins with a phospho-signaling cascade. *Proc Natl Acad Sci*  
1094 **105**: 16602–16607.
- 1095 Ireton K, Jin S, Grossman AD, Sonenshein AL. 1995. Krebs cycle function is required for  
1096 activation of the Spo0A transcription factor in *Bacillus subtilis*. *Proc Natl Acad Sci* **92**: 2845–  
1097 2849.
- 1098 Jacobs C, Domian IJ, Maddock JR, Shapiro L. 1999. Cell Cycle–Dependent Polar Localization

- 1099 of an Essential Bacterial Histidine Kinase that Controls DNA Replication and Cell Division.  
1100 *Cell* **97**: 111–120.
- 1101 Jin S, Sonenshein AL. 1994. Identification of two distinct *Bacillus subtilis* citrate synthase  
1102 genes. *J Bacteriol* **176**: 4669–4679.
- 1103 Joshi KK, Bergé M, Radhakrishnan SK, Viollier PH, Chien P. 2015. An Adaptor Hierarchy  
1104 Regulates Proteolysis during a Bacterial Cell Cycle. *Cell* **163**: 419–431.
- 1105 Joshi KK, Chien P. 2016. Regulated Proteolysis in Bacteria: *Caulobacter*. *Annu Rev Genet* **50**:  
1106 423–445.
- 1107 Kim KS, Rosenkrantz MS, Guarente L. 1986. *Saccharomyces cerevisiae* contains two  
1108 functional citrate synthase genes. *Mol Cell Biol* **6**: 1936–1942.
- 1109 Kirkpatrick CL, Viollier PH. 2012. Decoding *Caulobacter* development. *FEMS Microbiol Rev*  
1110 **36**: 193–205.
- 1111 Lakshmi TM, Helling RB. 1976. Selection for citrate synthase deficiency in *icd* mutants of  
1112 *Escherichia coli*. *J Bacteriol* **127**: 76–83.
- 1113 Lam H, Schofield WB, Jacobs-Wagner C. 2006. A Landmark Protein Essential for Establishing  
1114 and Perpetuating the Polarity of a Bacterial Cell. *Cell* **124**: 1011–1023.
- 1115 Laub MT, McAdams HH, Feldblyum T, Fraser CM, Shapiro L. 2000. Global Analysis of the  
1116 Genetic Network Controlling a Bacterial Cell Cycle. *Science* **290**: 2144–2148.
- 1117 Lesley JA, Shapiro L. 2008. SpoT Regulates DnaA Stability and Initiation of DNA Replication  
1118 in Carbon-Starved *Caulobacter crescentus*. *J Bacteriol* **190**: 6867–6880.

- 1119 Leslie DJ, Heinen C, Schramm FD, Thüring M, Aakre CD, Murray SM, Laub MT, Jonas K.  
1120 2015. Nutritional Control of DNA Replication Initiation through the Proteolysis and Regulated  
1121 Translation of DnaA. *PLoS Genet* **11**: e1005342.
- 1122 Liberati NT, Urbach JM, Miyata S, Lee DG, Drenkard E, Wu G, Villanueva J, Wei T, Ausubel  
1123 FM. 2006. An ordered, nonredundant library of *Pseudomonas aeruginosa* strain PA14  
1124 transposon insertion mutants. *Proc Natl Acad Sci* **103**: 2833–2838.
- 1125 Liu K, Bittner AN, Wang JD. 2015. Diversity in (p)ppGpp metabolism and effectors. *Curr Opin*  
1126 *Microbiol* **24**: 72–79.
- 1127 Marks ME, Castro-Rojas CM, Teiling C, Du L, Kapatral V, Walunas TL, Crosson S. 2010. The  
1128 Genetic Basis of Laboratory Adaptation in *Caulobacter crescentus*. *J Bacteriol* **192**: 3678–  
1129 3688.
- 1130 McGrath PT, Iniesta AA, Ryan KR, Shapiro L, McAdams HH. 2006. A Dynamically Localized  
1131 Protease Complex and a Polar Specificity Factor Control a Cell Cycle Master Regulator. *Cell*  
1132 **124**: 535–547.
- 1133 Mitchell CG. 1996. Regulation of the activities of citrate synthase isoenzymes from  
1134 *Pseudomonas aeruginosa* PAC 514. *Biochem Soc Trans* **24**: 219S-219S.
- 1135 Mohl DA, Gober JW. 1997. Cell Cycle–Dependent Polar Localization of Chromosome  
1136 Partitioning Proteins in *Caulobacter crescentus*. *Cell* **88**: 675–684.
- 1137 Monahan LG, Harry EJ. 2016. You Are What You Eat: Metabolic Control of Bacterial  
1138 Division. *Trends Microbiol* **24**: 181–189.
- 1139 Narayanan S, Janakiraman B, Kumar L, Radhakrishnan SK. 2015. A cell cycle-controlled redox

- 1140 switch regulates the topoisomerase IV activity. *Genes Dev* **29**: 1175–1187.
- 1141 Paul R, Jaeger T, Abel S, Wiederkehr I, Folcher M, Biondi EG, Laub MT, Jenal U. 2008.  
1142 Allosteric Regulation of Histidine Kinases by Their Cognate Response Regulator Determines  
1143 Cell Fate. *Cell* **133**: 452–461.
- 1144 Pereira DS, Donald LJ, Hosfield DJ, Duckworth HW. 1994. Active site mutants of Escherichia  
1145 coli citrate synthase. Effects of mutations on catalytic and allosteric properties. *J Biol Chem*  
1146 **269**: 412–417.
- 1147 Pezzatti J, Bergé M, Boccard J, Codesido S, Gagnebin Y, H. Viollier P, González-Ruiz V,  
1148 Rudaz S. 2019a. Choosing an Optimal Sample Preparation in Caulobacter crescentus for  
1149 Untargeted Metabolomics Approaches. *Metabolites* **9**: 193.
- 1150 Pezzatti J, González-Ruiz V, Codesido S, Gagnebin Y, Joshi A, Guillaume D, Schappler J,  
1151 Picard D, Boccard J, Rudaz S. 2019b. A scoring approach for multi-platform acquisition in  
1152 metabolomics. *J Chromatogr A* **1592**: 47–54.
- 1153 Puszynska AM, O’Shea EK. 2017. ppGpp Controls Global Gene Expression in Light and in  
1154 Darkness in *S. elongatus*. *Cell Rep* **21**: 3155–3165.
- 1155 Quon KC, Marczyński GT, Shapiro L. 1996. Cell Cycle Control by an Essential Bacterial Two-  
1156 Component Signal Transduction Protein. *Cell* **84**: 83–93.
- 1157 Radhakrishnan SK, Pritchard S, Viollier PH. 2010. Coupling Prokaryotic Cell Fate and  
1158 Division Control with a Bifunctional and Oscillating Oxidoreductase Homolog. *Dev Cell* **18**:  
1159 90–101.
- 1160 Radhakrishnan SK, Thanbichler M, Viollier PH. 2008. The dynamic interplay between a cell



- 1161 fate determinant and a lysozyme homolog drives the asymmetric division cycle of *Caulobacter*  
1162 *crescentus*. *Genes Dev* **22**: 212–225.
- 1163 Ronneau S, Petit K, De Bolle X, Hallez R. 2016. Phosphotransferase-dependent accumulation  
1164 of (p)ppGpp in response to glutamine deprivation in *Caulobacter crescentus*. *Nat Commun* **7**:  
1165 11423.
- 1166 Rosenkrantz M, Alam T, Kim KS, Clark BJ, Srere PA, Guarente LP. 1986. Mitochondrial and  
1167 nonmitochondrial citrate synthases in *Saccharomyces cerevisiae* are encoded by distinct  
1168 homologous genes. *Mol Cell Biol* **6**: 4509–4515.
- 1169 Ruprich-Robert G, Zickler D, Berteaux-Lecellier V, Vélot C, Picard M. 2002. Lack of  
1170 mitochondrial citrate synthase discloses a new meiotic checkpoint in a strict aerobe. *EMBO J*  
1171 **21**: 6440.
- 1172 Sanselicio S, Viollier PH. 2015. Convergence of Alarmone and Cell Cycle Signaling from  
1173 Trans-Encoded Sensory Domains. *mBio* **6**: e01415-15.
- 1174 Schindelin J, Arganda-Carreras I, Frise E, Kaynig V, Longair M, Pietzsch T, Preibisch S,  
1175 Rueden C, Saalfeld S, Schmid B, et al. 2012. Fiji - an Open Source platform for biological  
1176 image analysis. *Nat Methods* **9**: 676–682.
- 1177 Schneider CA, Rasband WS, Eliceiri KW. 2012. NIH Image to ImageJ: 25 years of Image  
1178 Analysis. *Nat Methods* **9**: 671–675.
- 1179 Simon R, Prierer U, Pühler A. 1983. A Broad Host Range Mobilization System for In Vivo  
1180 Genetic Engineering: Transposon Mutagenesis in Gram Negative Bacteria. *Nat Biotechnol* **1**:  
1181 784–791.

- 1182 Sinha AK, Winther KS, Roghanian M, Gerdes K. Fatty acid starvation activates RelA by  
1183 depleting lysine precursor pyruvate. *Mol Microbiol* **0**.
- 1184 Skerker JM, Prasol MS, Perchuk BS, Biondi EG, Laub MT. 2005. Two-Component Signal  
1185 Transduction Pathways Regulating Growth and Cell Cycle Progression in a Bacterium: A  
1186 System-Level Analysis. *PLoS Biol* **3**: e334.
- 1187 Skerker JM, Shapiro L. 2000. Identification and cell cycle control of a novel pilus system in  
1188 *Caulobacter crescentus*. *EMBO J* **19**: 3223–3234.
- 1189 Stott KV, Wood SM, Blair JA, Nguyen BT, Herrera A, Mora YGP, Cuajungco MP, Murray  
1190 SR. 2015. (p)ppGpp modulates cell size and the initiation of DNA replication in *Caulobacter*  
1191 *crescentus* in response to a block in lipid biosynthesis. *Microbiology* **161**: 553–564.
- 1192 Thanbichler M, Iniesta AA, Shapiro L. 2007. A comprehensive set of plasmids for vanillate-  
1193 and xylose-inducible gene expression in *Caulobacter crescentus*. *Nucleic Acids Res* **35**: e137.
- 1194 Thanbichler M, Shapiro L. 2008. Getting organized — how bacterial cells move proteins and  
1195 DNA |. *Nat Rev Microbiol* **6**: 28–40.
- 1196 Thanbichler M, Shapiro L. 2006. MipZ, a Spatial Regulator Coordinating Chromosome  
1197 Segregation with Cell Division in *Caulobacter*. *Cell* **126**: 147–162.
- 1198 Tsokos CG, Laub MT. 2012. Polarity and cell fate asymmetry in *Caulobacter crescentus*. *Curr*  
1199 *Opin Microbiol* **15**: 744–750.
- 1200 Viollier PH, Minas W, Dale GE, Folcher M, Thompson CJ. 2001. Role of Acid Metabolism in  
1201 *Streptomyces coelicolor* Morphological Differentiation and Antibiotic Biosynthesis. *J*  
1202 *Bacteriol* **183**: 3184–3192.

- 1203 Viollier PH, Thanbichler M, McGrath PT, West L, Meewan M, McAdams HH, Shapiro L.  
1204 2004. Rapid and sequential movement of individual chromosomal loci to specific subcellular  
1205 locations during bacterial DNA replication. *Proc Natl Acad Sci U S A* **101**: 9257–9262.
- 1206 Wang B, Dai P, Ding D, Rosario AD, Grant RA, Pentelute BL, Laub MT. 2019. Affinity-based  
1207 capture and identification of protein effectors of the growth regulator ppGpp. *Nat Chem Biol*  
1208 **15**: 141.
- 1209 Wheeler RT, Shapiro L. 1999. Differential Localization of Two Histidine Kinases Controlling  
1210 Bacterial Cell Differentiation. *Mol Cell* **4**: 683–694.
- 1211 Wu J, Ohta N, Newton A. 1998. An essential, multicomponent signal transduction pathway  
1212 required for cell cycle regulation in *Caulobacter*. *Proc Natl Acad Sci* **95**: 1443–1448.
- 1213 Yeh Y-C, Comolli LR, Downing KH, Shapiro L, McAdams HH. 2010. The *Caulobacter* Tol-  
1214 Pal Complex Is Essential for Outer Membrane Integrity and the Positioning of a Polar  
1215 Localization Factor. *J Bacteriol* **192**: 4847–4858.
- 1216 Zalis EA, Nuxoll AS, Manuse S, Clair G, Radlinski LC, Conlon BP, Adkins J, Lewis K. 2019.  
1217 Stochastic Variation in Expression of the Tricarboxylic Acid Cycle Produces Persister Cells.  
1218 *mBio* **10**: e01930-19.
- 1219 Zhang Y, Zborníková E, Rejman D, Gerdes K. 2018. Novel (p)ppGpp Binding and  
1220 Metabolizing Proteins of *Escherichia coli*. *mBio* **9**: e02188-17.
- 1221

A

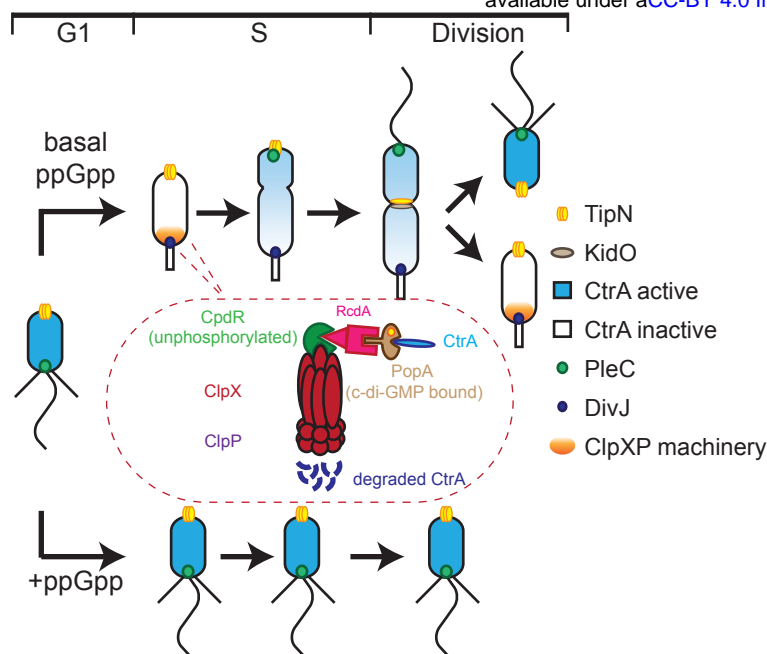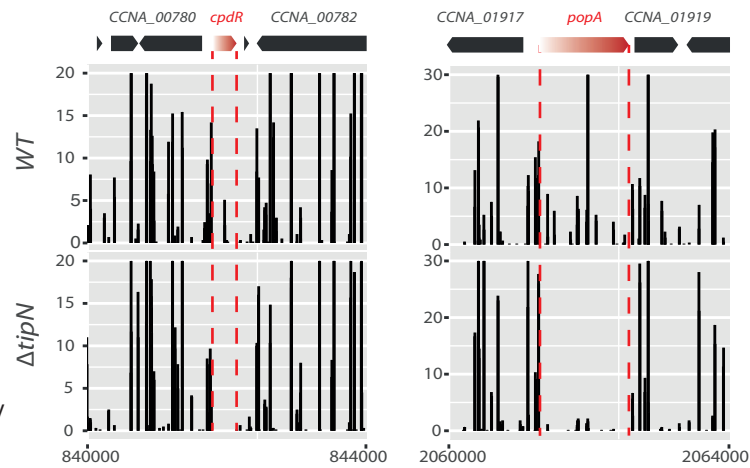

C

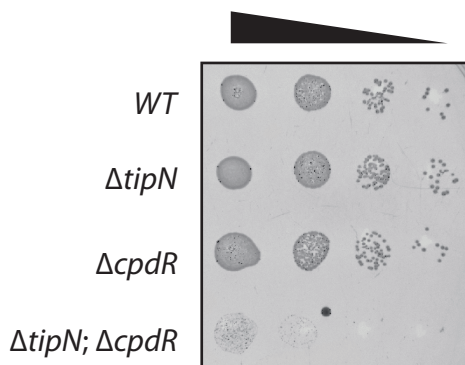

D

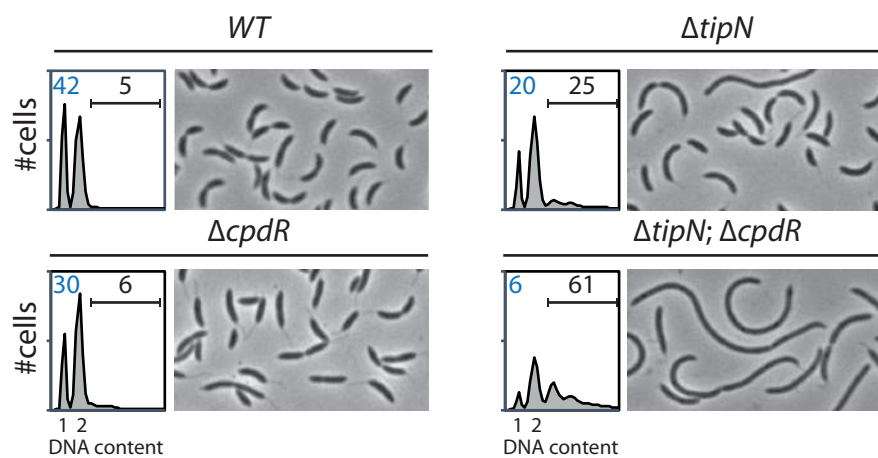

### Figure 1- Synthetic sick interaction between *tipN* and the adaptors of the ClpXP machinery

(A) Schematic of the different stage of *C. crescentus* cell cycle (G1 phase, S phase and division are showed) in normal condition (upper part). TipN (yellow dot) and KidO (brown circle) localization are represented along the cell cycle. Phosphorylated CtrA (blue) activates transcription of G1 phase genes and prevent DNA replication in the swarmer cell. Upon transition from a swarmer to staked cell, ClpXP machinery (red) and its adaptor CpdR (green), RcdA (pink) and PopA (beige) localizes to the incipient stalked pole where it degrades CtrA, allowing DNA replication and cell division. In the pre-divisional cell, the antagonistic kinase/phosphatase pair, DivJ (purple dot) and PleC (green dot) indirectly influence the phosphorylation of CtrA with the stalked cell compartment or swarmer cell compartment respectively. PleC promotes CtrA phosphorylation in the swarmer cell while DivJ prevents its phosphorylation in the stalked cell. Pili and flagella are depicted as straight wavy lines respectively. (p)ppGpp production occurring in carbon or nitrogen starvation prevents swarmer to stalked cell transitions (bottom part). (B) Transposon libraries were generated in the *WT* and the  $\Delta tipN$  mutant (MB556). The sites of Tn insertion were identified by deep sequencing and mapped onto the *C. crescentus* NA1000 reference genome. Two regions of the genome showing the *cpdR* and *popA* locus are depicted. The height of each line reflects the number of sequencing reads at this position and all the graph between *WT* and  $\Delta tipN$  are scaled similarly. Tn insertions in *cpdR* and *popA* were reduced in the  $\Delta tipN$  mutant compared to the *WT*. (C) Spot dilutions of the indicated strains (MB1, MB556, MB2001, MB2017 from top to bottom). The four strains were grown overnight, adjusted at an OD<sub>600</sub> of 0.5 and serially diluted. Eight microliters of each dilutions were spotted onto PYE plates. (D) Flow cytometry profiles and phase contrast images of *WT* (MB1),  $\Delta tipN$  (MB556),  $\Delta cpdR$  (MB2001) or  $\Delta tipN \Delta cpdR$  (MB2017) double mutants. Genome content (labelled as DNA content) was analyzed by FACS during exponential phase in PYE.

A

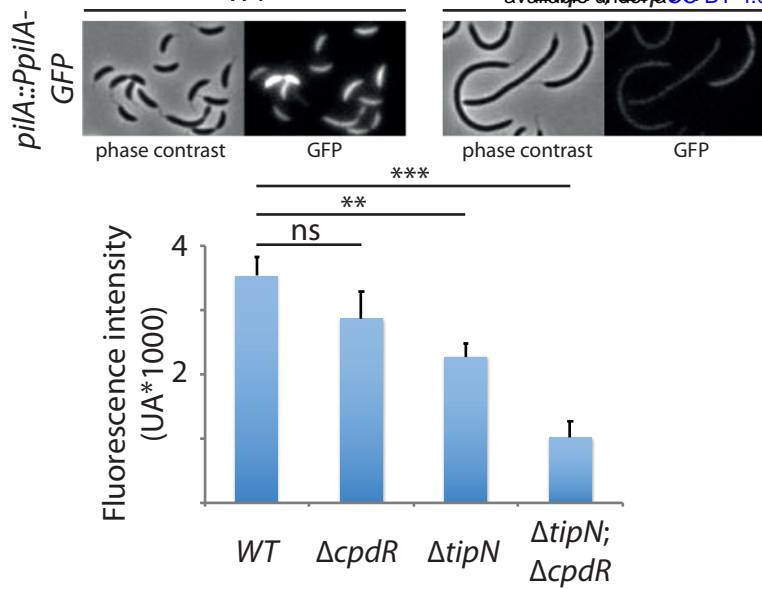

B

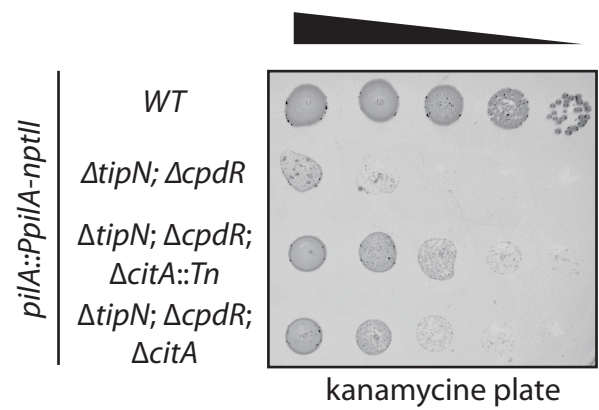

C

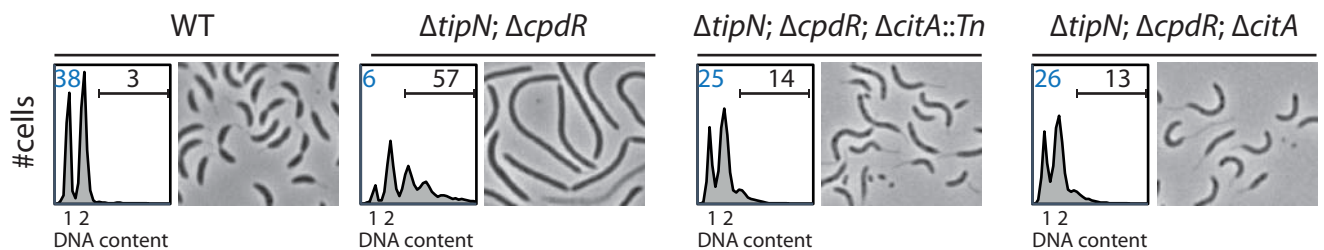

## Figure 2- Genetic screen to identify Tn insertions that enhance CtrA

(A) CtrA activity in the *WT* (MB2325),  $\Delta tipN$  (MB2337) and  $\Delta cpdR$  (MB2329) single mutant cells, and  $\Delta tipN \Delta cpdR$  (MB2331) double mutant cells was monitored using a *pilA::P<sub>pilA</sub>-GFP* transcriptional reporter whose activity is dependent on the activity of CtrA. Fluorescence intensity was automatically quantified and t-test was performed to determine the significance with  $p < 0.05$  (\*\*) and  $p < 0.005$  (\*\*\*). (B) Spot dilutions of the indicated strains (MB2268, MB2271, MB3056, MB3058 from top to bottom) carrying the *pilA::P<sub>pilA</sub>-nptII* transcriptional reporter on PYE plates containing kanamycin ( $20 \mu\text{g} \cdot \text{mL}^{-1}$ ). (C) FACS profiles and phase contrast images of the strain described in panel B. FACS analysis showing genome content (ploidy) of cells growing exponentially in PYE and then treated by rifampicin ( $50 \mu\text{g}/\text{ml}$ ) for 3 h to inhibit DNA replication. Numbers (%) of G1-phase cells and cells containing more than 2 chromosomes is indicated in blue and black respectively.

A

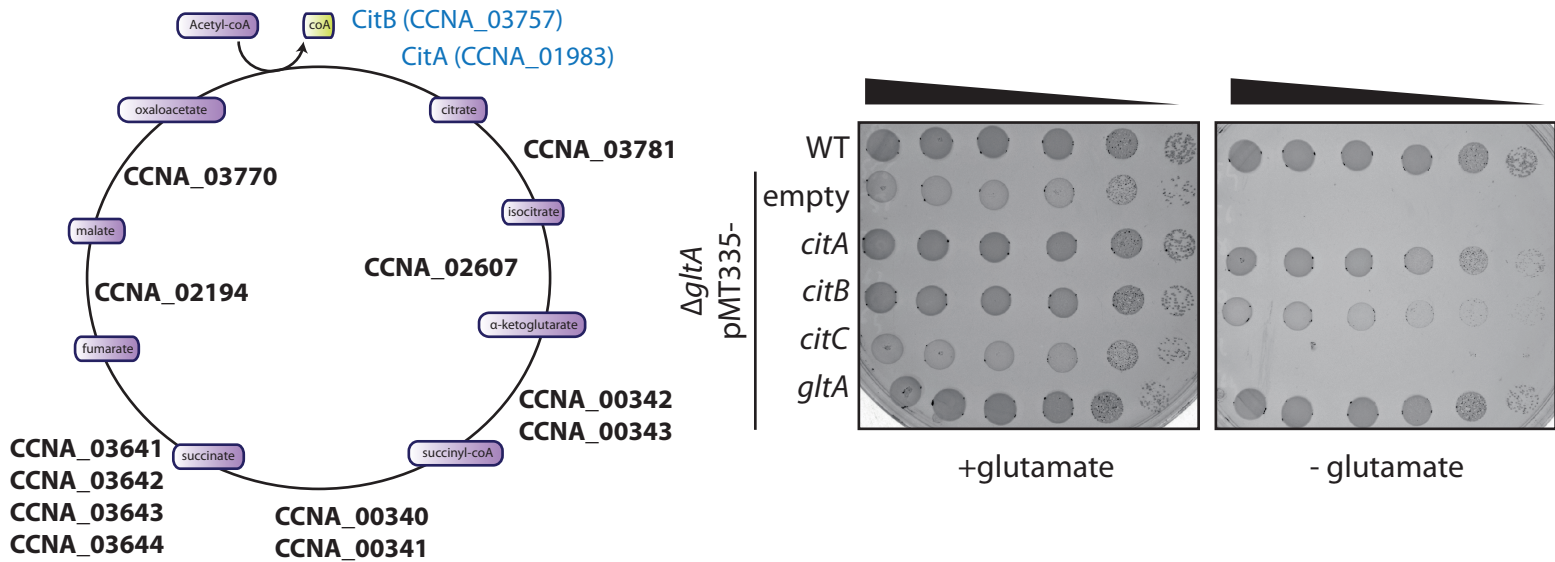

C

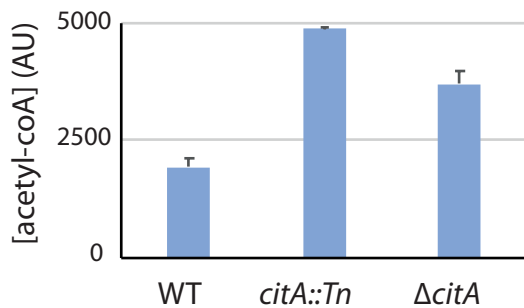

D

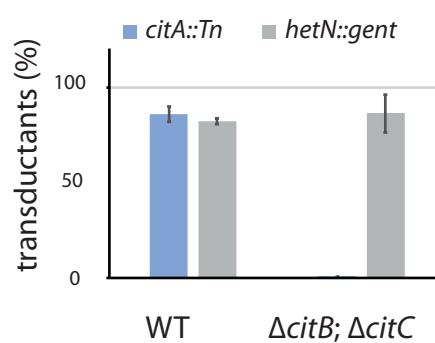

E

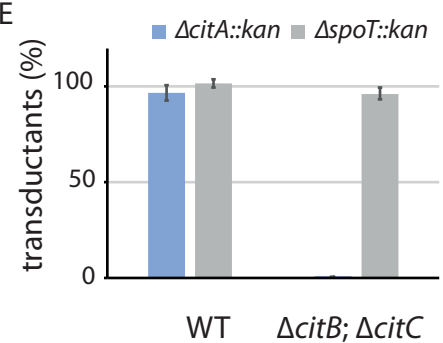

### Figure 3- *C. crescentus* genome encodes two functional citrate synthase

(A) A schematic Krebs cycle is represented. The two functional citrate synthase are indicated in blue. Essential enzymes from the Krebs are highlighted in bold. (B) Spot dilutions of the indicated *E. coli* strains (eMB554, eMB556, eMB558, eMB560, eMB562 and eMB564 from top to bottom) on minimal medium containing or not glutamate. Only the strain carrying a functional citrate synthase can grow without glutamate. (C) LC-MS-based quantification of acetyl-CoA in extract of *WT* (MB1), *citA::Tn* (MB2622) and  $\Delta$ *citA* (MB2559) cells grown in PYE liquid cultures. Error bars denote the standard deviation from three biological replicates. (D)  $\phi$ Cr30-mediated generalized transduction frequencies of *citA::Tn* into *WT* (MB1) or  $\Delta$ *citBC* double mutant cells (MB2679). For transduction, cells were normalized according to the  $OD_{600} \sim 1$  and infected with the same amount of  $\phi$ Cr30 harboring either *citA::Tn* or a transposon insertion in the *hetN* gene (encoding gentamycin resistance) as a control of transduction. The transductions were selected on PYE plates containing gentamycin. The numbers of colonies were counted after 3 days of incubation at 30°C. Error bars denote the standard deviation for three independent experiments. Cells harboring the  $\Delta$ *citBC* mutation are not able to accept *citA::Tn* mutation. (E) Same as in panel D using the  $\Delta$ *citA::kan* allele or a deletion in the *spoT* gene (encoding kanamycin resistance) delivered by  $\phi$ Cr30-mediated generalized transduction as a control. Transductants were selected on PYE plates containing kanamycin.

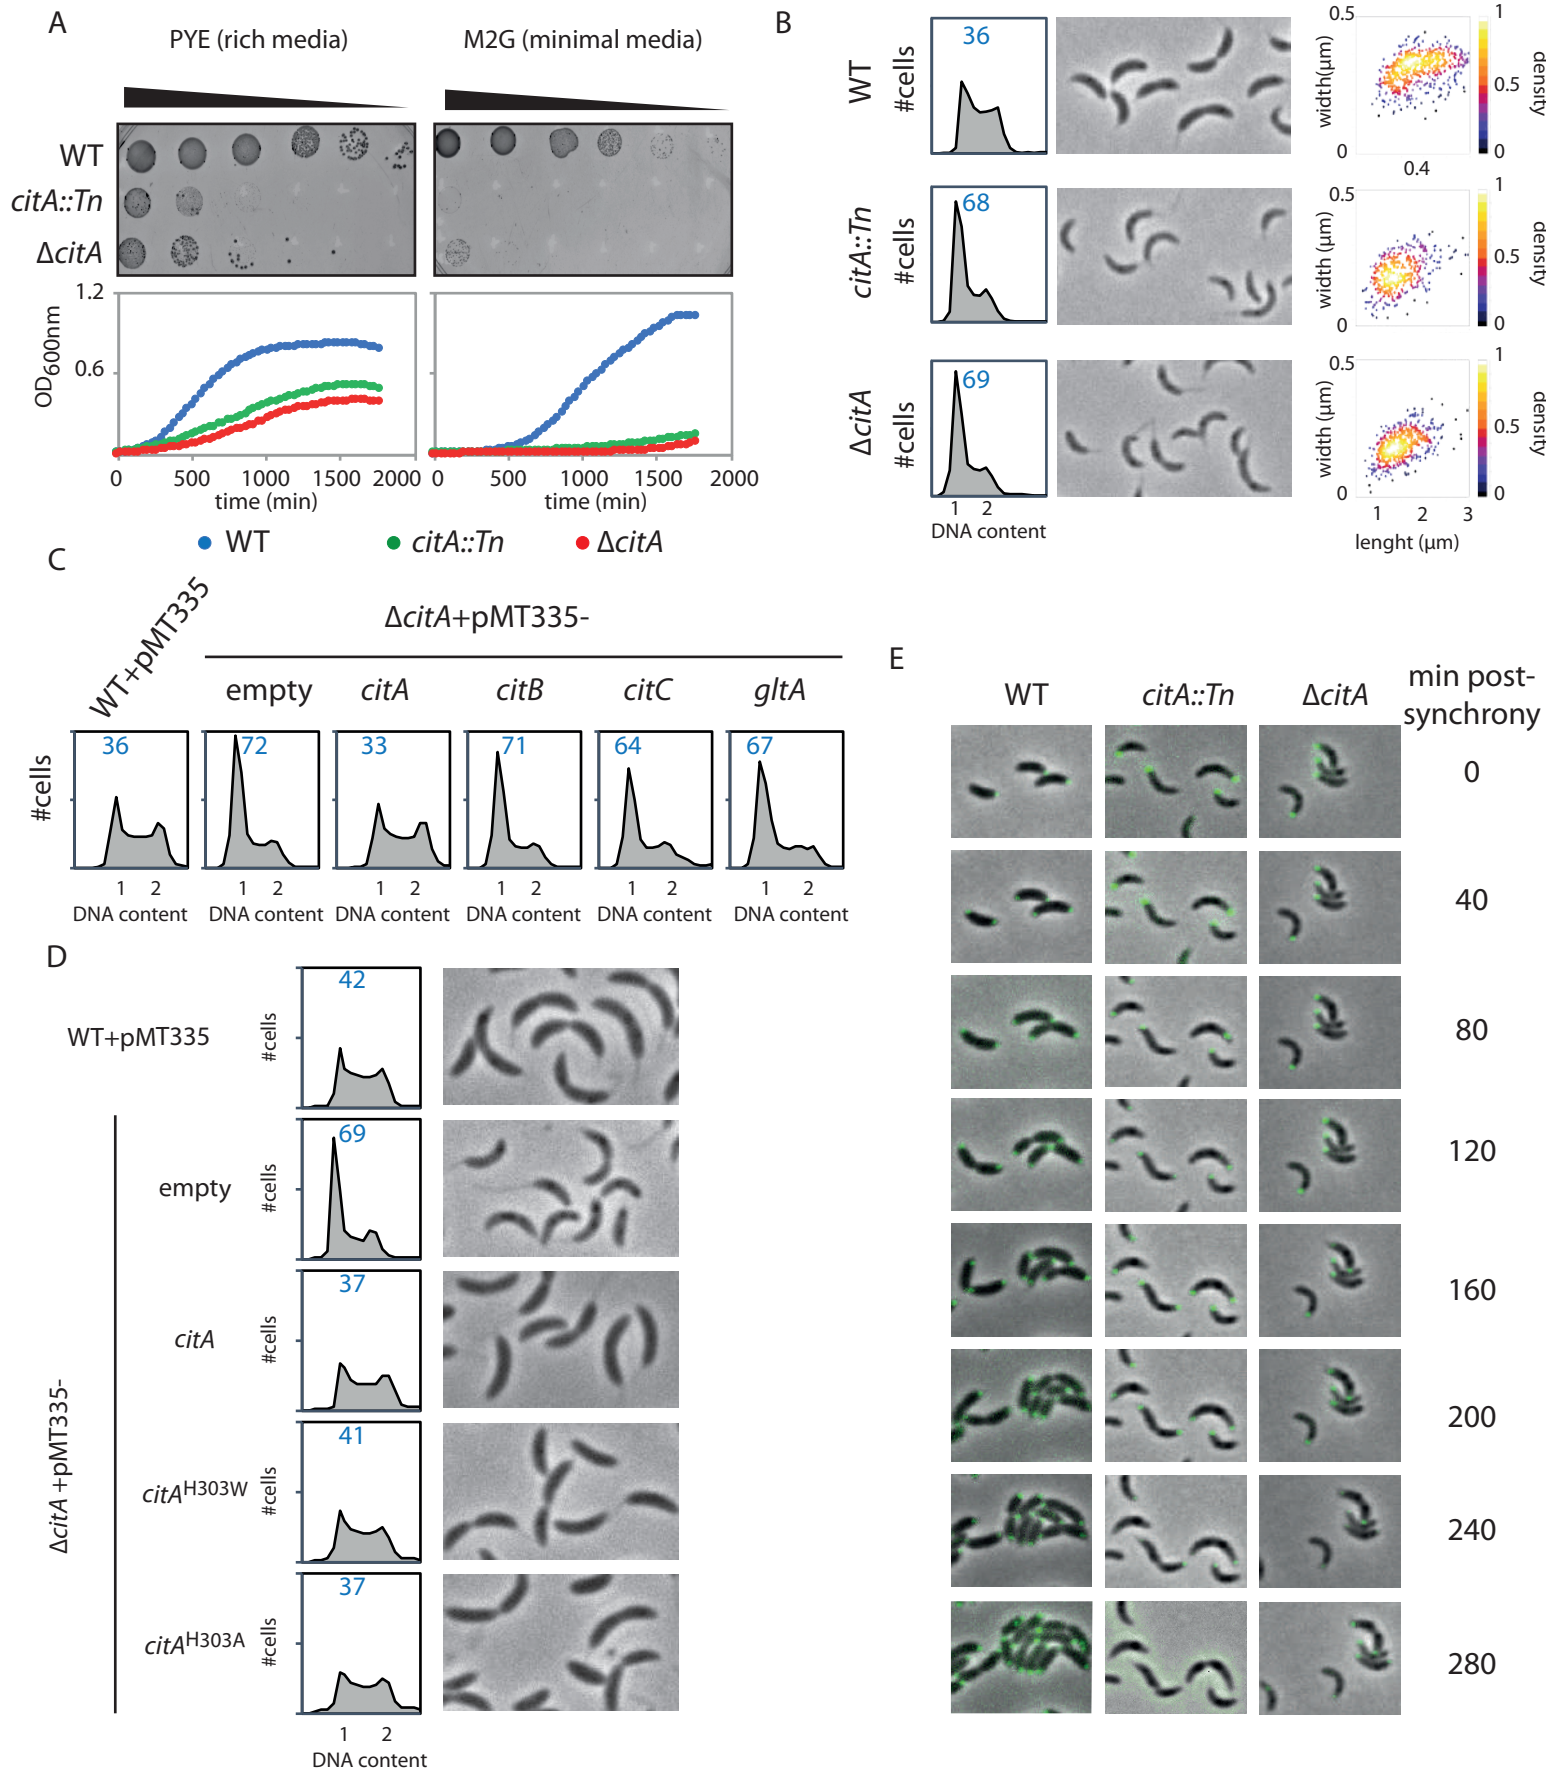

#### Figure 4- Inactivation of CitA induces a G1 block

(A) Spot dilution and growth curve of the WT (MB1), *citA::Tn* (MB2622) and  $\Delta citA$  (MB2559). For spot dilution, cells were grown overnight in PYE, adjusted to  $OD_{600nm} \sim 0.5$  and serially diluted on a rich PYE medium (left upper part) or on a minimal M<sub>2</sub>G medium (right upper part). For growth curve, cells were grown overnight in PYE, washed twice with M<sub>2</sub> buffer and similar amount of each strain was used to inoculate PYE medium (left bottom part) or M<sub>2</sub>G medium (right bottom part). (B) Flow cytometry profiles and phase contrast images of WT (MB1), *citA::Tn* (MB2622) and  $\Delta citA$  (MB2559). Cells were exponentially grown in PYE and genome content was analyzed by FACS. Right part is a scatter plot of cell lengths and widths of each indicated population. (C) Flow cytometry profiles showing complementation of the  $\Delta citA$  strain expressing an empty plasmid (MB3433) or *citA* (MB3435), *citB* (MB3469), *citC* (MB3471) from *C. crescentus* or the citrate synthase from *E. coli* (*gltA*) (MB3473). WT cells harboring an empty pMT335 are also shown (MB1537). (D) Flow cytometry profiles and phase contrast images of *C. crescentus* expressing a catalytic mutant of CitA. WT carrying an empty plasmid (MB1537), or  $\Delta citA$  harboring an empty plasmid (MB3433) or *citA* (MB3435) or *citA*<sup>H303A</sup> (MB3439) or *citA*<sup>H303W</sup> (MB3437) are showed. (E) Time-lapse fluorescence microscopy of WT (MB557), *citA::Tn* (MB2452) and  $\Delta citA$  (MB3467) harbouring a *parB::gfp-parB*. Cells were grown in PYE, synchronized and spotted on a PYE agarose pad. Each picture was taken every 20 minutes.



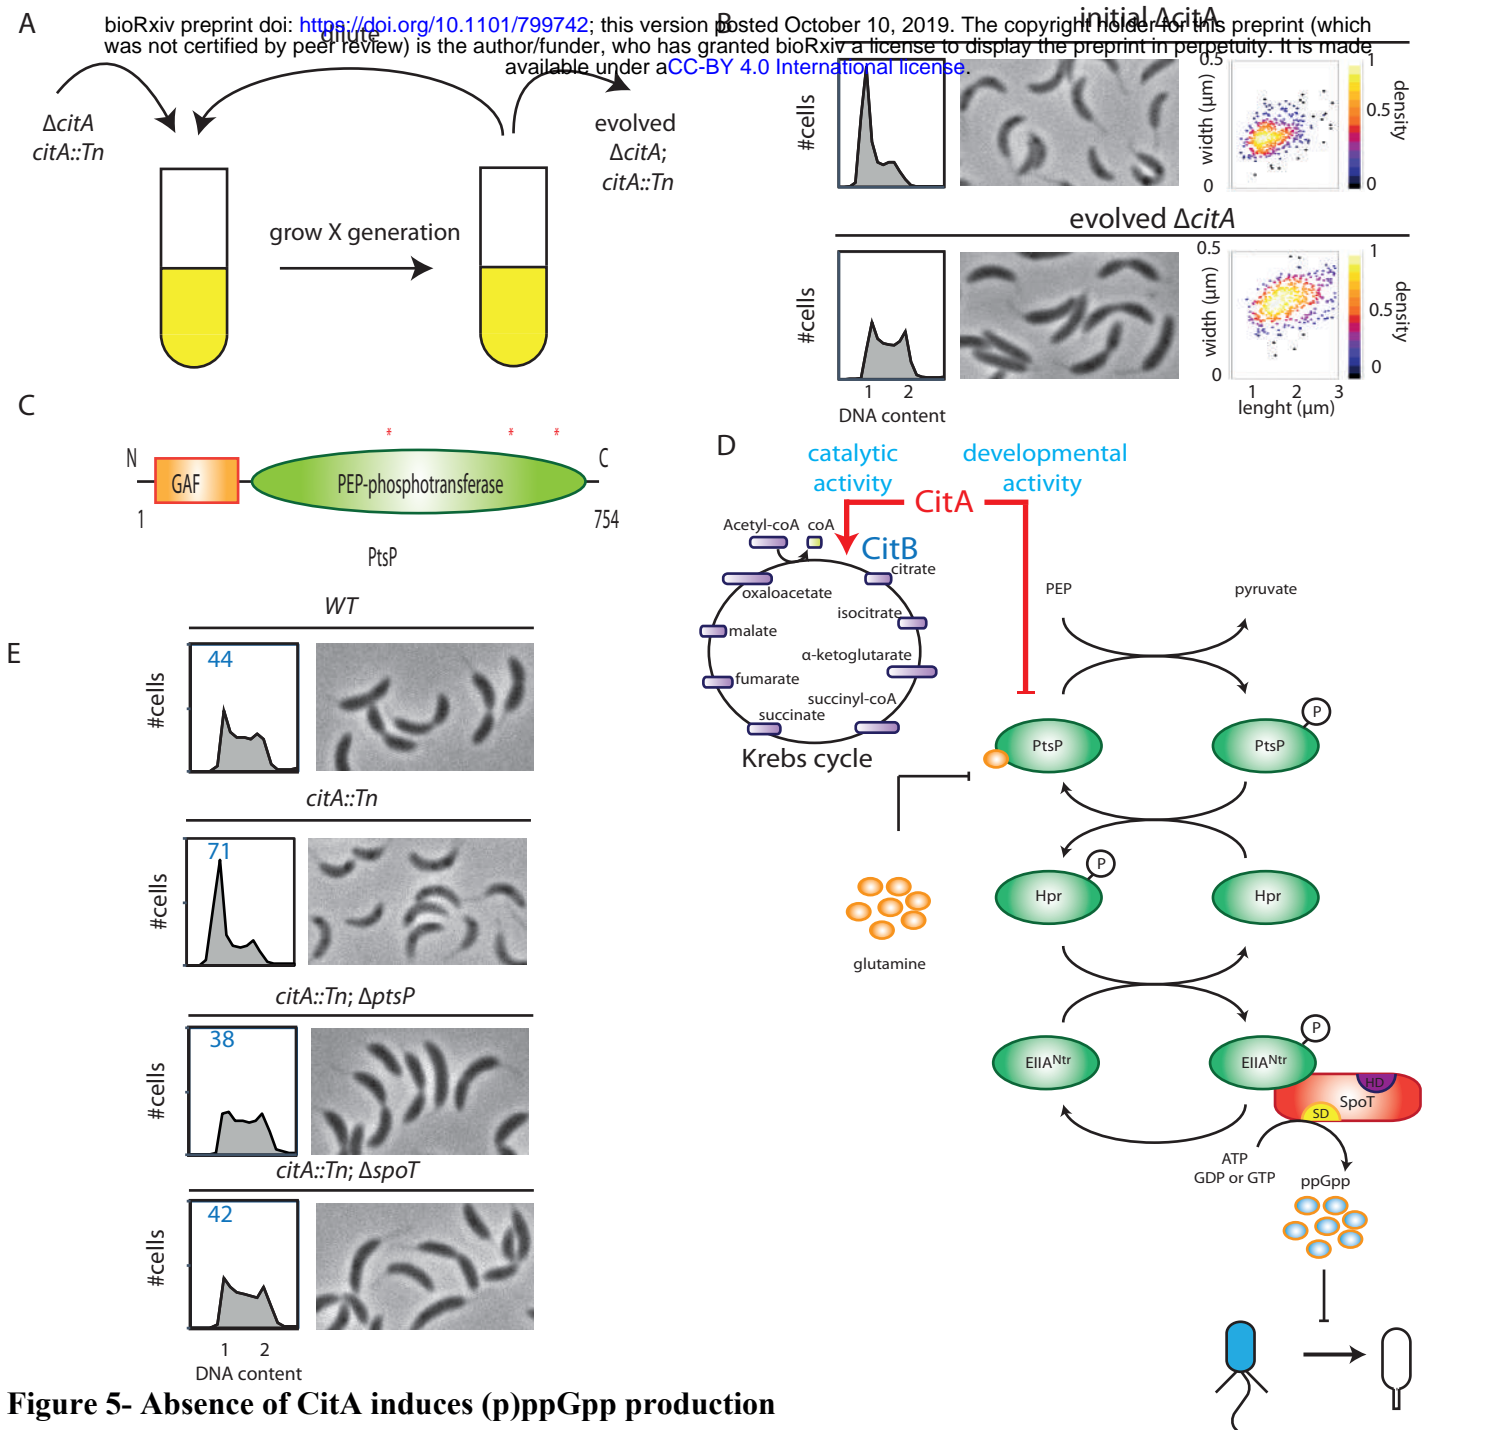

### Figure 5- Absence of CitA induces (p)ppGpp production

(A) Cartoon of experimental evolution of  $\Delta citA$  or *citA::Tn* by serial dilution. The suppressors were identified based on their ability to grow better in PYE medium after 4 days of dilution. (B) Flow cytometry profiles and phase contrast images of  $\Delta citA$  (initial strain, upper part) or  $\Delta citA$  after the evolution experiment (evolved strain, bottom part). Cells were exponentially grown in PYE and genome content was analyzed by FACS. Right part is a scatter plot of cell lengths and widths of each indicated population. (C) Domain organization of PtsP from the N to C terminus, indicating the total length in amino acid of the protein. The two domains, GAF and PEP-phosphotransferase are indicated. Asterisks indicate the position of the suppressive mutation leading to frameshift mutation in the PtsP PEP-phosphotransferase domain. (D) The Pts<sup>Ntr</sup> pathway is represented (adapted from Ronneau et al. 2016). Intracellular glutamine regulates the autophosphorylation of PtsP. In case of nitrogen starvation, glutamine pool drops triggering PtsP phosphorylation leading to increase of phosphorylated EII<sup>Ntr</sup>. Once phosphorylated, EII<sup>Ntr</sup> inhibits the hydrolase activity of SpoT leading to (p)ppGpp accumulation, blocking the swarmer to stalked cell transition. The two functions of CitA are represented, one acting as a metabolic enzyme into the Krebs cycle and the other one acting on the development of *C. crescentus*, independently of its catalytic activity. Absence of CitA activates the Pts<sup>Ntr</sup> pathway, by a glutamine-independent mechanism, triggering (p)ppGpp production delaying the swarmer to stalk transition. (E) Flow cytometry profiles and phase contrast images of *WT* (MB1), *citA::Tn* (MB2622),  $\Delta spoT$  *citA::Tn* (MB2413) and  $\Delta ptsP$  *citA::Tn* (MB2426). Genome content was analyzed by FACS during exponential phase in PYE.

## SUPPLEMENTAL MATERIALS AND FIGURES

### Supplemental Table S3- *C. crescentus* and *E. coli* strains

| Name                                | Relevant genotype/ description                                                                                                                                                                                                                                                  | source or ref                  |
|-------------------------------------|---------------------------------------------------------------------------------------------------------------------------------------------------------------------------------------------------------------------------------------------------------------------------------|--------------------------------|
| <b><i>C. crescentus</i> strains</b> |                                                                                                                                                                                                                                                                                 |                                |
| MB1                                 | NA1000; Synchronizable derivative of wild-type strain CB15                                                                                                                                                                                                                      | (Evinger and Agabian 1977)     |
| MB557                               | NA1000; <i>parB::GFP-parB</i>                                                                                                                                                                                                                                                   | (Thanbichler and Shapiro 2006) |
| MB2403                              | NA1000 ; $\Delta spoT$                                                                                                                                                                                                                                                          | (Boutte et al. 2012)           |
| MB2417                              | NA1000 ; $\Delta ptsP$                                                                                                                                                                                                                                                          | (Sanselicio and Viollier 2015) |
| MB556                               | NA1000; $\Delta tipN$                                                                                                                                                                                                                                                           | (Huitema et al. 2006)          |
| MB46                                | NA1000; $\Delta popA$                                                                                                                                                                                                                                                           | (Duerig et al. 2009)           |
| MB47                                | NA1000; $\Delta cpdR::\Omega$                                                                                                                                                                                                                                                   | (Iniesta et al. 2006)          |
| MB48                                | NA1000; $\Delta rcdA::hyg$                                                                                                                                                                                                                                                      | (McGrath et al. 2006)          |
| MB2001                              | NA1000; $\Delta cpdR::tet$                                                                                                                                                                                                                                                      | (Skerker et al. 2005)          |
| MB1972                              | NA1000 ; $\Delta kidO$ ; <i>xylX::kidO<sup>AA::DD</sup></i>                                                                                                                                                                                                                     | (Radhakrishnan et al. 2010)    |
| MB2405                              | NA1000 ; $\Delta kidO$                                                                                                                                                                                                                                                          | (Radhakrishnan et al. 2010)    |
| MB3282                              | NA1000 ; <i>xylX::relA<sup>-flag</sup></i>                                                                                                                                                                                                                                      | (Gonzalez and Collier 2014)    |
| MB3288                              | NA1000 ; <i>xylX::relA<sup>ΔE335Q-flag</sup></i>                                                                                                                                                                                                                                | (Gonzalez and Collier 2014)    |
| MB3075                              | NA1000; $\Delta tipN$ ; $\Delta popA$                                                                                                                                                                                                                                           | This study                     |
| MB3079                              | NA1000; $\Delta tipN$ ; $\Delta rcdA::\Omega$                                                                                                                                                                                                                                   | This study                     |
| MB2017                              | NA1000; $\Delta tipN$ ; $\Delta cpdR::tet$                                                                                                                                                                                                                                      | This study                     |
| MB2366                              | NA1000 ; $\Delta tipN$ ; <i>xylX::kidO<sup>AA::DD</sup></i>                                                                                                                                                                                                                     | This study                     |
| MB2720                              | NA1000; $\Delta tipN$ ; $\Delta cpdR::tet$ ; $\Delta kidO$                                                                                                                                                                                                                      | This study                     |
| MB2325                              | NA1000; <i>pilA::P<sub>pilA</sub>-GFP</i>                                                                                                                                                                                                                                       | This study                     |
| MB2327                              | NA1000; $\Delta cpdR::\Omega$ ; <i>pilA::P<sub>pilA</sub>-GFP</i>                                                                                                                                                                                                               | This study                     |
| MB2329                              | NA1000; $\Delta tipN$ ; <i>pilA::P<sub>pilA</sub>-GFP</i>                                                                                                                                                                                                                       | This study                     |
| MB2331                              | NA1000; $\Delta tipN$ ; $\Delta cpdR::\Omega$ ; <i>pilA::P<sub>pilA</sub>-GFP</i>                                                                                                                                                                                               | This study                     |
| MB2268                              | NA1000; <i>pilA::P<sub>pilA</sub>-nptII</i>                                                                                                                                                                                                                                     | This study                     |
| MB2271                              | NA1000; $\Delta tipN$ ; $\Delta cpdR::tet$ ; <i>pilA::P<sub>pilA</sub>-nptII</i>                                                                                                                                                                                                | This study                     |
| MB3056                              | NA1000; $\Delta tipN$ ; $\Delta cpdR::tet$ ; <i>citA::Tn</i> ; <i>pilA::P<sub>pilA</sub>-nptII</i>                                                                                                                                                                              | This study                     |
| MB3058                              | NA1000; $\Delta tipN$ ; $\Delta cpdR::tet$ ; $\Delta citA$ ; <i>pilA::P<sub>pilA</sub>-nptII</i>                                                                                                                                                                                | This study                     |
| MB2679                              | NA1000; $\Delta citB$ ; $\Delta citC$                                                                                                                                                                                                                                           | This study                     |
| MB2622                              | NA1000; <i>citA::Tn</i>                                                                                                                                                                                                                                                         | This study                     |
| MB2559                              | NA1000; <i>citA</i> ; <i>citA::pNTPS138-ΔcitA</i>                                                                                                                                                                                                                               | This study                     |
| MB1537                              | NA1000; pMT335                                                                                                                                                                                                                                                                  | This study                     |
| MB3433                              | NA1000 ; $\Delta citA$ ; pMT335                                                                                                                                                                                                                                                 | This study                     |
| MB3435                              | NA1000; $\Delta citA$ ; pMT335- <i>citA</i>                                                                                                                                                                                                                                     | This study                     |
| MB3469                              | NA1000; $\Delta citA$ ; pMT335- <i>citB</i>                                                                                                                                                                                                                                     | This study                     |
| MB3471                              | NA1000; $\Delta citA$ ; pMT335- <i>citC</i>                                                                                                                                                                                                                                     | This study                     |
| MB3473                              | NA1000 ; $\Delta citA$ ; pMT335- <i>gltA</i>                                                                                                                                                                                                                                    | This study                     |
| MB3437                              | NA1000; $\Delta citA$ ; pMT335- <i>citA<sup>H303W</sup></i>                                                                                                                                                                                                                     | This study                     |
| MB3439                              | NA1000; $\Delta citA$ ; pMT335- <i>citA<sup>H303A</sup></i>                                                                                                                                                                                                                     | This study                     |
| MB2452                              | NA1000; <i>parB::GFP-parB</i> ; <i>citA::Tn</i>                                                                                                                                                                                                                                 | This study                     |
| MB3467                              | NA1000; <i>parB::GFP-parB</i> ; $\Delta citA$ ; <i>citA::pNTPS138-ΔcitA</i>                                                                                                                                                                                                     | This study                     |
| MB2413                              | NA1000 ; $\Delta spoT$ ; <i>citA::Tn</i>                                                                                                                                                                                                                                        | This study                     |
| MB2426                              | NA1000 ; $\Delta ptsP$ ; <i>citA::Tn</i>                                                                                                                                                                                                                                        | This study                     |
| MB3382                              | NA1000 ; $\Delta tipN$ ; $\Delta cpdR::tet$ ; $\Delta spoT$ ; $\Delta citA$                                                                                                                                                                                                     | This study                     |
| MB3386                              | NA1000 ; $\Delta tipN$ ; $\Delta cpdR::tet$ ; $\Delta ptsP$ ; $\Delta citA$                                                                                                                                                                                                     | This study                     |
| MB3366                              | NA1000 ; $\Delta tipN$ ; $\Delta cpdR::tet$ ; <i>xylX::relA<sup>-flag</sup></i>                                                                                                                                                                                                 | This study                     |
| MB3368                              | NA1000 ; $\Delta tipN$ ; $\Delta cpdR::tet$ ; <i>xylX::relA<sup>ΔE335Q-flag</sup></i>                                                                                                                                                                                           | This study                     |
| <b><i>E. coli</i> strains</b>       |                                                                                                                                                                                                                                                                                 |                                |
| S17-1                               | RP4, Tc::Mu Km::Tn7                                                                                                                                                                                                                                                             | (Simon et al. 1983)            |
| EC100D                              | F- <i>mcrA</i> $\Delta$ ( <i>mrr</i> - <i>hsdRMS</i> - <i>mcrBC</i> ) $\Phi$ 80 $\Delta$ lacZ $\Delta$ M15 $\Delta$ lacX74 <i>recA1</i> <i>endA1</i> <i>araD139</i> $\Delta$ ( <i>ara</i> , <i>leu</i> )7697 <i>galU</i> <i>galK</i> $\lambda$ - <i>rpsL</i> (StrR) <i>nupG</i> | Epicentre                      |
| BW25113                             | F- $\Delta$ ( <i>araD</i> - <i>araB</i> )567 $\Delta$ lacZ4787( <i>::rrnB-3</i> ) <i>rph-1</i> $\Delta$ ( <i>rhaD</i> - <i>rhaB</i> )568 $\Delta$ hsdR514                                                                                                                       | CGSC                           |
| JW0710-1                            | BW35113; $\Delta$ <i>gltA770::kan</i>                                                                                                                                                                                                                                           | (Baba et al. 2006)             |
| eMB554                              | BW35113; pMT335                                                                                                                                                                                                                                                                 | This study                     |
| eMB556                              | BW35113; $\Delta$ <i>gltA770::kan</i> ; pMT335                                                                                                                                                                                                                                  | This study                     |
| eMB558                              | BW35113; $\Delta$ <i>gltA770::kan</i> ; pMT335- <i>citA</i>                                                                                                                                                                                                                     | This study                     |
| eMB560                              | BW35113; $\Delta$ <i>gltA770::kan</i> ; pMT335- <i>citB</i>                                                                                                                                                                                                                     | This study                     |
| eMB562                              | BW35113; $\Delta$ <i>gltA770::kan</i> ; pMT335- <i>citC</i>                                                                                                                                                                                                                     | This study                     |
| eMB564                              | BW35113; $\Delta$ <i>gltA770::kan</i> ; pMT335- <i>gltA</i>                                                                                                                                                                                                                     | This study                     |
| eMB581                              | BW35113; $\Delta$ <i>gltA770::kan</i> ; pMT335- <i>citA<sup>H303W</sup></i>                                                                                                                                                                                                     | This study                     |
| eMB583                              | BW35113; $\Delta$ <i>gltA770::kan</i> ; pMT335- <i>citA<sup>H303A</sup></i>                                                                                                                                                                                                     | This study                     |

## Supplemental Table S4- plasmids

| Name     | description                                                                   | source or ref             |
|----------|-------------------------------------------------------------------------------|---------------------------|
| pNTPS138 | Two-part selection in in-frame deletion- integration vector: oriT+ sacB+ KanR | Alley MRK, unpublished    |
| pMT335   | High copy plasmid carrying a PVan promoter (gentR)                            | (Thanbichler et al. 2007) |
| pXGFPN-2 | Integration of C-terminal egfp-fusions at Caulobacter $P_{xytX}$ locus (kanR) | (Thanbichler et al. 2007) |
| pSC      | Derivative of pET26b (kanR)                                                   | (Bergé et al. 2016)       |
| pMB278   | pNTPS138- $\Delta$ <i>citA</i>                                                | This study                |
| pMB288   | pNTPS138- $\Delta$ <i>citB</i>                                                | This study                |
| pMB289   | pNTPS138- $\Delta$ <i>citC</i>                                                | This study                |
| pMB309   | pNTPS138- $\Delta$ <i>citB/C</i>                                              | This study                |
| pMB302   | pMT335- <i>citA</i>                                                           | This study                |
| pMB303   | pMT335- <i>citB</i>                                                           | This study                |
| pMB304   | pMT335- <i>citC</i>                                                           | This study                |
| pMB310   | pMT335- <i>gltA</i>                                                           | This study                |
| pMB287   | pSC- <i>citA</i>                                                              | This study                |
| pMB325   | pMT335- <i>citA</i> <sup>H303W</sup>                                          | This study                |
| pMB326   | pMT335- <i>citA</i> <sup>H303A</sup>                                          | This study                |

## Supplemental Table S5- primers

| Name   | sequence                                    |
|--------|---------------------------------------------|
| OMB173 | 5'- AAAAAAAGCTTTGGACTGGGCCAAGCTCAATC -3'    |
| OMB174 | 5'- AAAAAGCTGCAGATCGTCAGCGTGGC -3'          |
| OMB175 | 5'- AAAAAGCTGCAGCTACGTCACGCTCGACAAG -3'     |
| OMB176 | 5'- AAAAAGAATTCGTGCATGCCATGGTCGTGCTC -3'    |
| OMB184 | 5'- AAAAAAAGCTTTCAGCCAGGGTCAGGAAC -3'       |
| OMB185 | 5'- AAAAACATATGGGCGATCACGCCCTCAAGAC -3'     |
| OMB186 | 5'- AAAAACATATGGTCGGACCCGAGGTC -3'          |
| OMB187 | 5'- AAAAAGAATTCATCGCCCGAGATCGCG -3'         |
| OMB188 | 5'- AAAAAAAGCTTACGCCTCGGATCATCCGCAG -3'     |
| OMB189 | 5'- AAAAACATATGCAGAACCTGCTCTGCGTC -3'       |
| OMB190 | 5'- AAAAACATATGGCGGGCTACTCGCCCTC -3'        |
| OMB191 | 5'- AAAAAGAATTCCTGTGCGGTCGCGCAGTTC -3'      |
| OMB179 | 5'- AAAAACATATGACCGATAAAGCCACGCTG -3'       |
| OMB182 | 5'- AAAAAGAATTCAGCGCTTGTGCGAGCGTGACG -3'    |
| OMB194 | 5'- AAAAACATATGATGTCTGATGGTCTTGAGGGCGTG -3' |
| OMB195 | 5'- AAAAAGAATTCAGCCGCGACGCGGACCTC -3'       |
| OMB196 | 5'- AAAAACATATGACCGACTGGATGGACG -3'         |
| OMB197 | 5'- AAAAAGAATTCATGAGGATGAGGAGGGCGAG -3'     |
| OMB203 | 5'- AAAAACATATGGCTGATACAAAAGCAAAACTC -3'    |
| OMB204 | 5'- AAAAAGAATTCACGCTTGATATCGCTTTAAAGTC -3'  |
| OMB183 | 5'- AAAAAAAGCTTGGCGCTTGTGCGAGCGTGAC -3'     |
| OMB232 | 5'- CTGATGGGCTTCGGCTGGCGCGTGTACAAGAAC -3'   |
| OMB233 | 5'- GTTCTTGACACGCGCCAGCCGAAGCCCATCAG -3'    |
| OMB236 | 5'- CTGATGGGCTTCGGCGCCGCGTGTACAAGAAC -3'    |
| OMB237 | 5'- GTTCTTGACACGCGGGCGCCGAAGCCCATCAG-3'     |

A

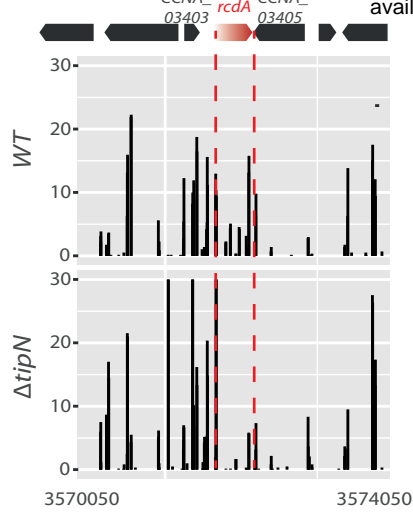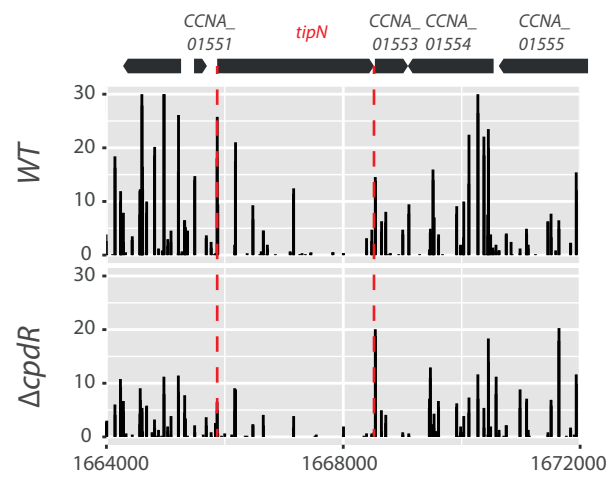

C

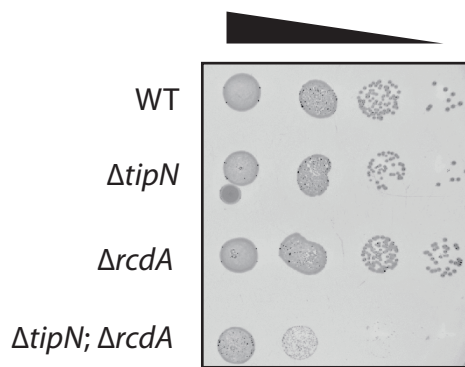

D

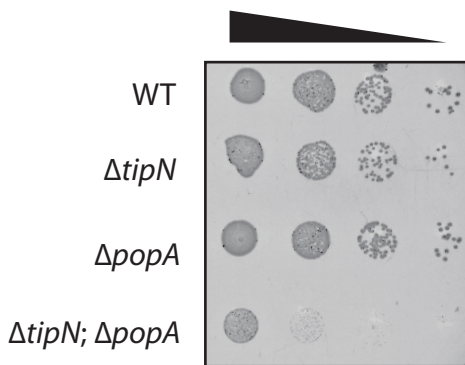

E

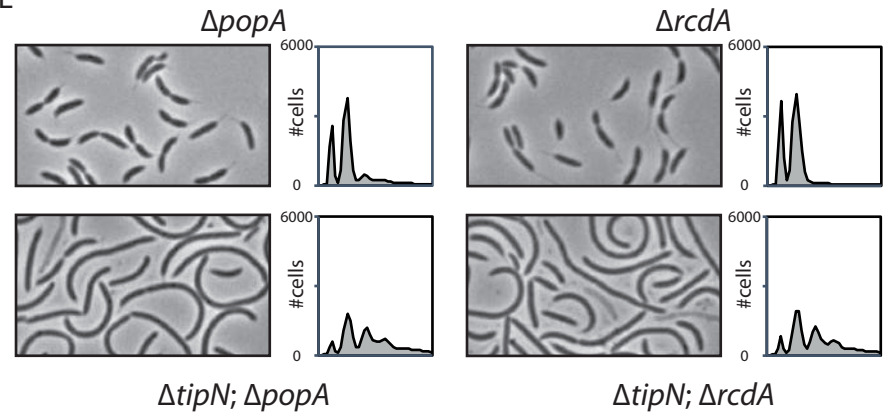

F

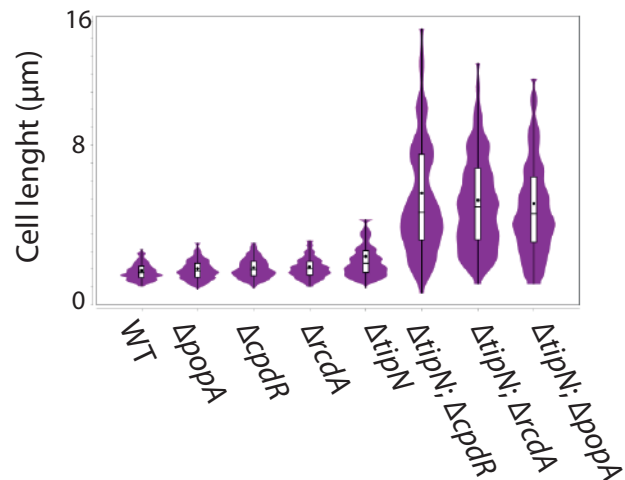

### Figure 1- Figure supplemental 1

(A) Transposon libraries were generated in the *WT* and the  $\Delta tipN$  mutant (MB556). The region of the *rcdA* locus is depicted. (B) Transposon libraries were generated in the *WT* and the  $\Delta cpdR$  mutant (MB2001). The *tipN* coding sequence is represented showing a decrease in Tn insertions in the two mutants compared to the *WT*. (C) Spot dilutions of the indicated strains (MB1, MB556, MB48, MB3079 from top to bottom) done as described in Figure 1C. (D) Spot dilutions of the indicated strains (MB1, MB556, MB46, MB3075 from top to bottom) done as described in Figure 1 panel C. (E) Flow cytometry profiles and phase contrast images of *WT* (MB1),  $\Delta popA$  (MB46),  $\Delta rcdA$  (MB48),  $\Delta tipN \Delta popA$  (MB3075) or  $\Delta tipN \Delta rcdA$  (MB3079) double mutants. Genome content was analyzed by FACS during exponential growth in PYE. (F) Cell size distribution of *WT* (MB1),  $\Delta popA$  (MB46),  $\Delta cpdR$  (MB2001),  $\Delta rcdA$  (MC48),  $\Delta tipN$  (MB556),  $\Delta tipN \Delta cpdR$  (MB2017),  $\Delta tipN \Delta rcdA$  (MB3079) and  $\Delta tipN \Delta popA$  (MB3075). Strains were grown in PYE media. The cell length was measured automatically using MicrobeJ.

A

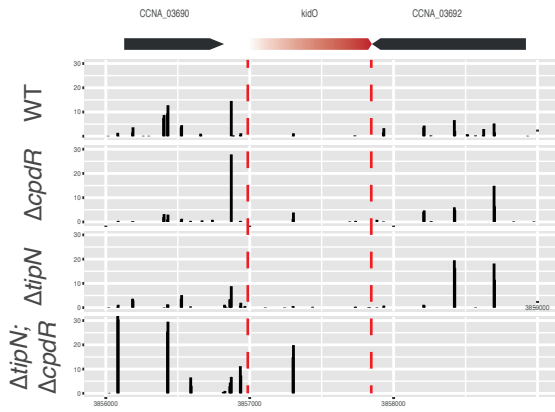

B

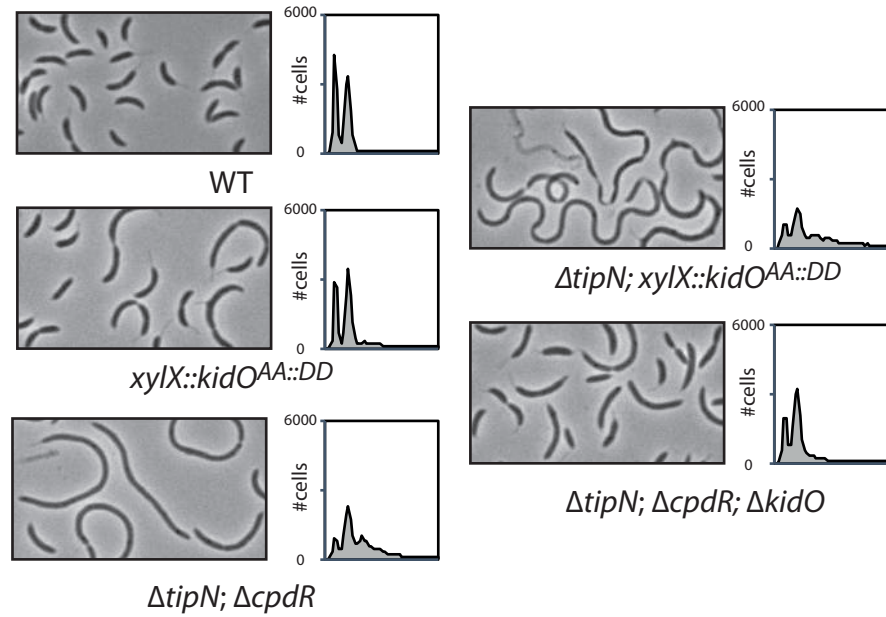

### Figure 1- Figure supplemental 2

(A) Transposon libraries were generated in the *WT*,  $\Delta cpdR$  (CC2001),  $\Delta tipN$  (MBC556) single mutants or  $\Delta tipN \Delta cpdR$  double mutant (MB2017). The sites of Tn insertion were identified by deep sequencing and mapped onto the *C. crescentus* NA1000 reference genome. The *kidO* locus is depicted. The height of each line reflects the number of sequencing reads at this position. Tn insertions in *kidO* was increased in the  $\Delta tipN \Delta cpdR$  double mutant compared to the *WT* or the  $\Delta tipN$  and  $\Delta cpdR$  single mutant. (F) Flow cytometry profiles and phase contrast images of *WT* (MB1),  $\Delta tipN \Delta cpdR$  double mutant (MB2017),  $\Delta tipN \Delta cpdR \Delta kidO$  triple mutant (MB2720) and the *WT* (MB1972) or  $\Delta tipN$  (MB2366) expressing a non-degradable version of KidO (KidO<sup>AA::DD</sup>) under the control of the xylose promoter at the *xylX* locus. Genome content was analyzed by FACS during exponential growth in PYE. Note that the expression of KidO<sup>AA::DD</sup> was not induced with xylose since the leakage of  $P_{xyl}$  was sufficient to induce strong filamentation in the double mutant  $\Delta tipN \Delta cpdR$ .

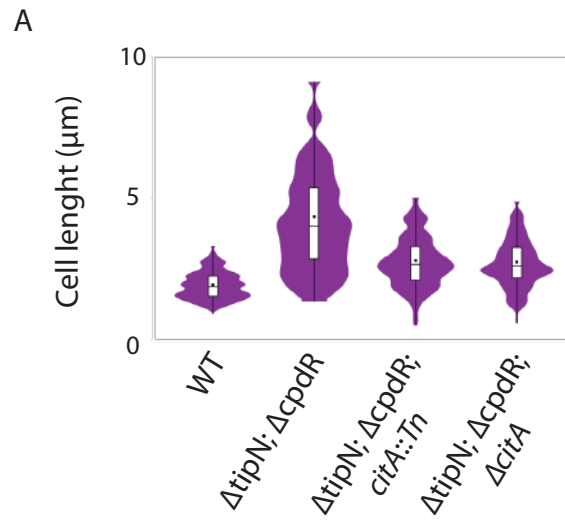

### Figure 2- Figure supplemental 1

(A) Cell size distribution of *WT* (MB2268) (n=638),  $\Delta tipN$  (MB2271)  $\Delta cpdR$  double mutant (n=635),  $\Delta tipN$   $\Delta cpdR$   $citA::Tn$  triple mutant cells (MB3056) (n=553); and  $\Delta tipN$   $\Delta cpdR$   $\Delta citA$  triple mutant cells (MB3058) (n=498). Strains were grown in PYE media. The cell length was measured automatically using MicrobeJ.

A

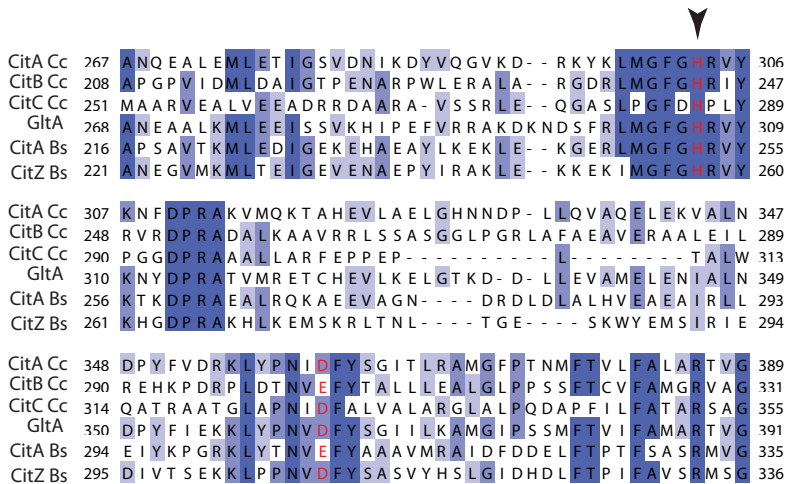

B

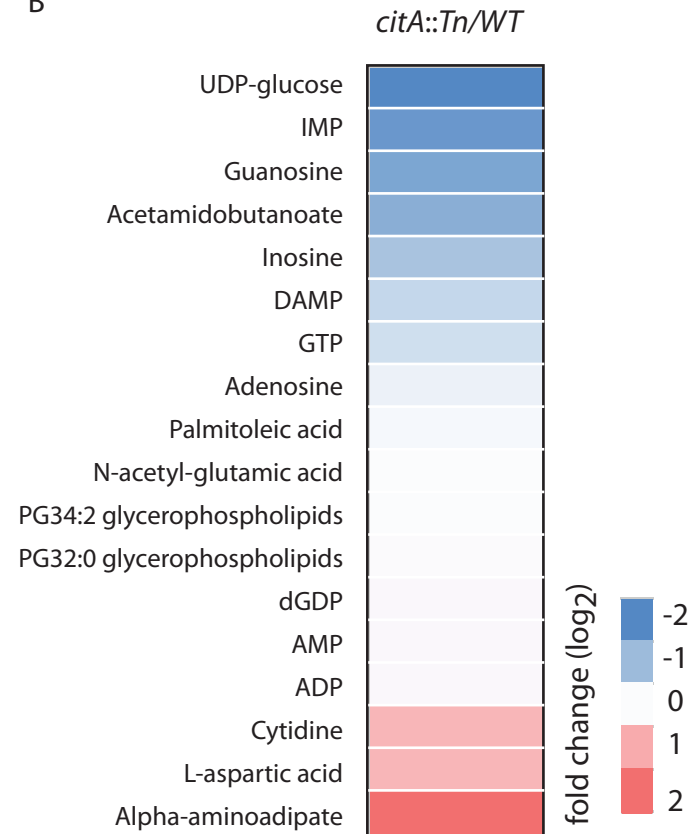

### Figure 3- Figure supplemental 1

(A) Partial alignment of the active site of CitA (A0A0H3C985) with CitB (A0A0H3CCE2) and CitC (A0A0H3CD20) from *C. crescentus*, GltA (P0ABH7) from *E. coli*, CitA (P39119) and CitZ (P39120) from *Bacillus subtilis*. The histidine and aspartic acid catalytic site are highlighted in red. Arrow indicates the alanine or tryptophan substitution abolishing the catalytic activity of CitA (figure 4). (B) Heatmap showing the changes in the level of various metabolites among the *WT* and *citA::Tn* as measured by LC-MS. Cells were grown on PYE medium. Only the metabolites that were significantly increased or decreased ( $p$ -value<0.05) in  $\Delta$ *citA* compared to *WT* cells are shown. Fold changes were calculated based on the mean of normalized ion counts from three biological replicates.

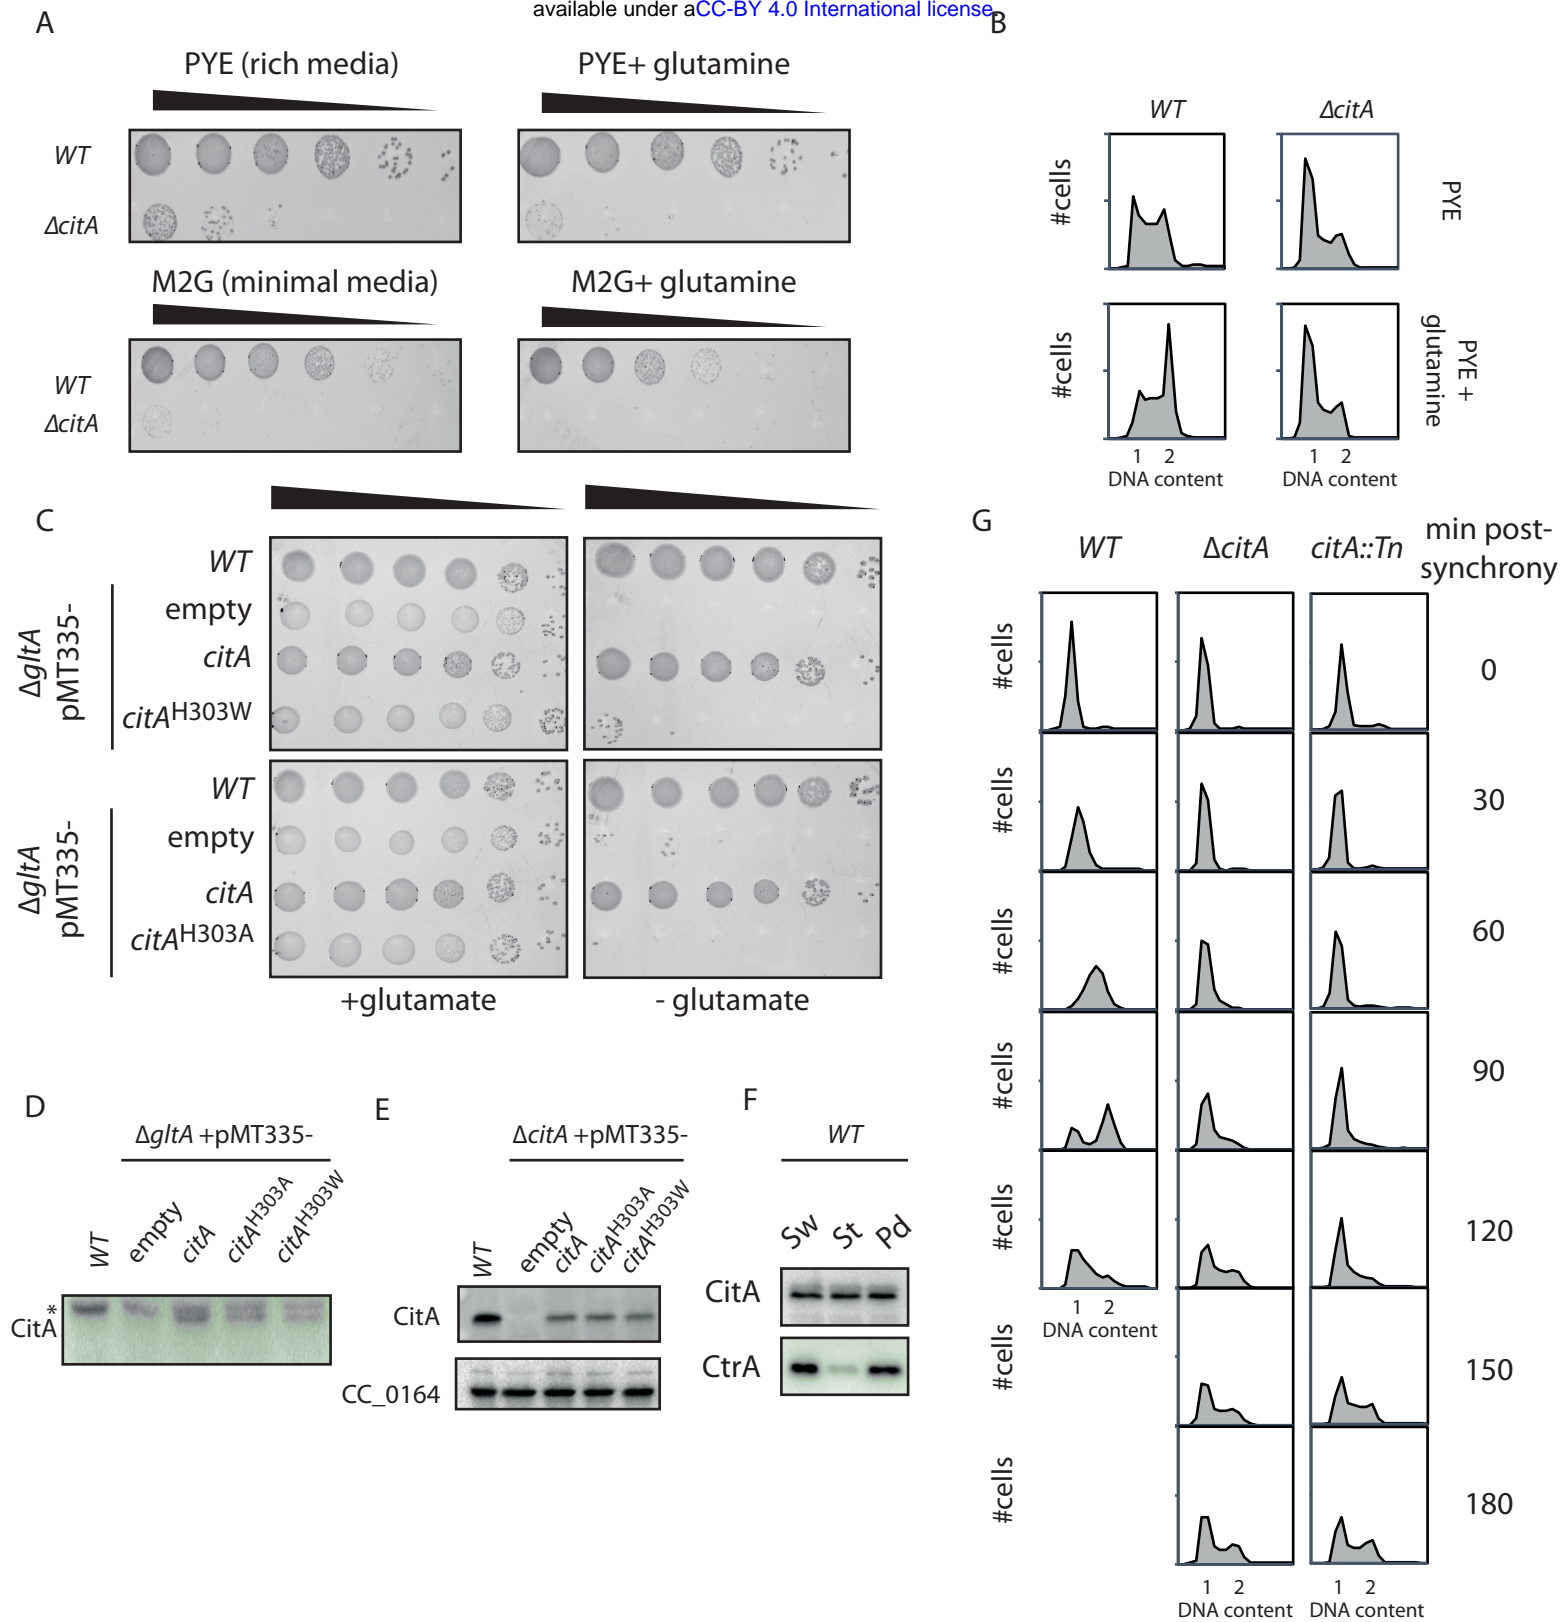



#### Figure 4- Figure supplemental 1

(A) Spot dilutions of the WT (MB1) and  $\Delta citA$  (MB2559). The two strains were grown overnight in PYE, adjusted at an OD600 of 0.5 and serially diluted on PYE plate (upper part) or minimal medium M2G (lower part) containing (right panel) or not (left panel) glutamine. Eight microliters of each dilutions were spotted onto plates. (B) Flow cytometry profiles of WT (MB1) and  $\Delta citA$  (MB2559). Genome content was analyzed by FACS during exponential phase in PYE (upper panel) or in PYE containing glutamine (lower panel). (C) Spot dilutions of the WT *E. coli* carrying an empty plasmid (eMB554) or *E. coli*  $\Delta gltA$  cells harboring an empty plasmid (eMB556) or expressing *citA*<sup>H303A</sup> (eMB583) or *citA*<sup>H303W</sup> (eMB581) on minimal medium containing (left panel) or not (right panel) glutamate. Only the strain carrying a functional citrate synthase could growth without glutamate. (D) Immunoblot showing the abundance of CitA in the *E. coli* strains presented in panel C using antibody to CitA. Asterisk point to proteins that cross-react with the anti-CitA antibodies. All the CitA variants are expressed at similar levels. (E) Immunoblot showing the abundance of CitA in the *C. crescentus* strains presented in figure 4D using antibody to CitA. All the CitA variants are expressed at similar level. (F) Immunoblotting to determine the relative abundance of CitA and CtrA during the cell cycle of WT (MB1) *C. crescentus*. All strains were in synchronized in PYE and the Sw, St and Pd time point were taken at 0 min, 25 min and 60min respectively post-synchrony. (G) Flow cytometry profiles of the WT (MB1), *citA::Tn* (MB2622) and  $\Delta citA$  (MB2559) to monitor DNA content throughout the *C. crescentus* cell cycle. WT (left panel), *citA::Tn* (middle panel) and  $\Delta citA$  (right panel) were synchronized and samples were withdrawn every 30 minutes and prepared for FACS analysis.

A

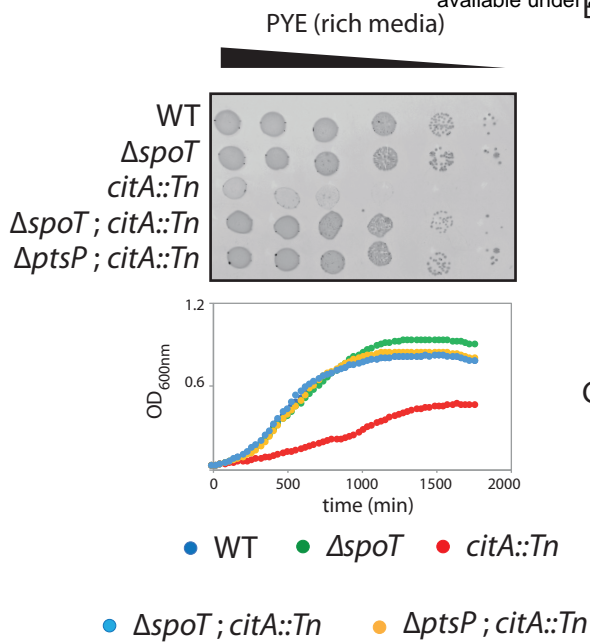

B

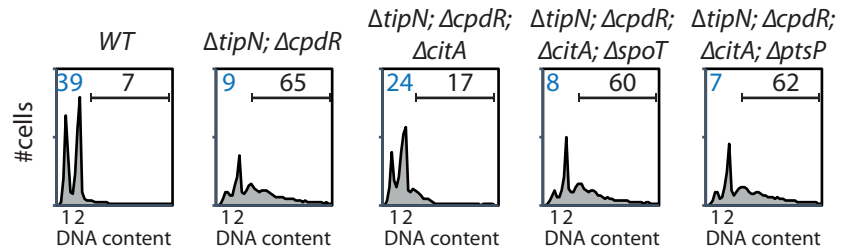

C

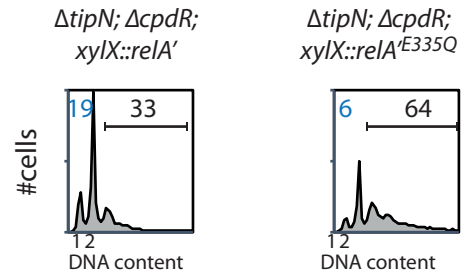

### Figure 5- Figure supplemental 1

(A) Spot dilution and growth curve of the *WT* (MB1),  $\Delta spoT$  (MB2403), *citA::Tn* (MB2622),  $\Delta spoT citA::Tn$  (MB2413) and  $\Delta ptsP citA::Tn$  (MB2426). For spot dilution, cells were grown overnight in PYE, adjusted to OD<sub>600nm</sub> ~0.5 and serially diluted on a rich PYE medium (upper part). For growth curve, cells were grown overnight in PYE, washed twice with M2 buffer and similar amount of each strain was used to inoculate PYE medium (left bottom part). (B) Flow cytometry profiles of *WT* (MB1),  $\Delta tipN \Delta cpdR$  (MB2017) double mutant,  $\Delta tipN \Delta cpdR \Delta citA$  (MB3058) triple mutant,  $\Delta tipN \Delta cpdR \Delta citA \Delta spoT$  (MB3382) or  $\Delta tipN \Delta cpdR \Delta citA \Delta ptsP$  (MB3386) quadruple mutant. Genome content was analyzed by FACS during exponential phase in PYE. (C) Flow cytometry profiles of  $\Delta tipN; \Delta cpdR$  expressing RelA' (MB3366) or RelA<sup>E335Q</sup> (MB3368) under the control of the xylose promoter at the *xylX* locus. Genome content was analyzed by FACS during exponential growth in PYE containing xylose for 5h to induce RelA' or RelA<sup>E335Q</sup>.
